# Supplementary material for: A Resource for Discovering Specific and Universal Biomarkers for Distributed Stem Cells
Source: PLoS One. 2011 Jul 19;6(7):e22077. doi: 10.1371/journal.pone.0022077 (PMC3139609; doi:10.1371/journal.pone.0022077)
Supplement: Table S1 — Self-renewal pattern associated (SRPA) genes, including the 85-gene asymmetric self-renewal associated (ASRA) gene signature. Expression data and annotation of all genes found to be significantly differentially regulated by the described RankProd intersection analysis is presented (See Materials and Methods). A RankProd percent false positive (pfp) cutoff of 0.05 was used. The expression values are given as log2 values. The fold change (FC; based on log2 values) refers to the average ratio of probe intensities on the ASYM chips to corresponding probe intensities the SYM chips. Genes are grouped based on the comparison in which they are differentially regulated. Genes up-regulated in the “A” (ASYM vs. SYM) and “B” (ASYM vs. p53SYM) comparisons are listed as ASRA_up; those that are down-regulated in these two comparisons are listed as ASRA_down. Genes that are up-regulated in only one comparison are listed in the A_up or B_up sections, and conversely genes that are down-regulated in only one comparison are listed in the A_down or B_down sections. Some genes are up-regulated in one comparison, but down-regulated in the other (i.e., if SYM>ASYM>p53SYM or if p53SYM>ASYM>SYM). These appear in the last two sections. Detection calls – whether expression is “present,” “marginal,” or “absent” (P, M, or A) – are summarized in columns immediately following the log2 expression values. If the call is A for all replicate chips for a self-renewal condition, the value cells are shaded; and if the call is P for all chips, the value cells are unshaded. If the calls are all M, or if they differ among replicate chips, an exclamation mark is given followed by the individual replicate calls. Data on the localization of the gene products was obtained from LOCATE [1]. “Type I” indicates that the protein is predicted to have one transmembrane domain, but does not have a signal peptide; and “type II” indicates that the protein is predicted to have a signal peptide and a transmembrane domain. [file pone.0022077.s001.xls]

## Sheet: test_005.txt
Probeset	Symbol	Name	Asym		Sym		p53Sym		FC	pfp	Localization
ASRA_up (= A_up and B_up)
Probeset	Symbol	Name	Asym		Sym		p53Sym		FC	pfp	Localization
NM_177702_at	4833427G06Rik	RIKEN cDNA 4833427G06 gene	8.1	P	3.56	A	4.81	! PA	4.54	0	cytoplasmic	ASRA_up
NM_010145_at	Ephx1	epoxide hydrolase 1, microsomal	11.65	P	7.8	P	10.2	P	3.85	0	cytoplasmic	ASRA_up
NM_028072_at	Sulf2	sulfatase 2	9.33	P	5.44	A	7.1	! PA	3.89	0	cytoplasmic, secreted	ASRA_up
NM_021897_at	Trp53inp1	transformation related protein 53 inducible nuclear protein 1	8.02	P	4.37	! PAA	6.67	P	3.65	0	cytoplasmic	ASRA_up
NM_010158_at	Khdrbs3	KH domain containing, RNA binding, signal transduction associated 3	7.4	P	3.76	A	3.48	A	3.63	0	cytoplasmic	ASRA_up
NM_001111099_at	Cdkn1a	cyclin-dependent kinase inhibitor 1A (P21)	9.66	P	5.86	A	7.44	P	3.81	0.001	cytoplasmic	ASRA_up
NM_001161432_at	Eda2r	ectodysplasin A2 isoform receptor	7.75	P	4.02	A	5.38	P	3.73	0.001	type II	ASRA_up
NM_009964_at	Cryab	crystallin, alpha B	10.37	P	7.46	P	9.15	P	2.91	0	cytoplasmic	ASRA_up
NM_009831_at	Ccng1	cyclin G1	12.09	P	9.19	P	10.85	P	2.91	0	cytoplasmic	ASRA_up
NM_181397_at	Rftn1	raftlin lipid raft linker 1	7.22	P	4.29	A	5.42	P	2.93	0	cytoplasmic	ASRA_up
NM_021515_at	Ak1	adenylate kinase 1	10.7	P	7.95	P	9.53	P	2.74	0	cytoplasmic	ASRA_up
NM_023633_at	2410016O06Rik	RIKEN cDNA 2410016O06 gene	7.81	! PMA	5.13	A	5.21	A	2.68	0	cytoplasmic	ASRA_up
NM_145448_at	9030617O03Rik	RIKEN cDNA 9030617O03 gene	8.95	P	6.37	! MMA	7.73	P	2.58	0	cytoplasmic	ASRA_up
NM_007570_at	Btg2	B-cell translocation gene 2, anti-proliferative	8.71	P	6.32	P	7.02	P	2.39	0	cytoplasmic	ASRA_up
NR_026733_at	3110039M20Rik	RIKEN cDNA 3110039M20 gene	6.49	P	4.16	A	4.89	P	2.33	0	non-coding RNA	ASRA_up
XM_916809_at	LOC640067	Derived by automated computational analysis using gene prediction method: GNOMON. Supporting evidence includes similarity to: 14 ESTs, 6 Proteins	6.26	! MMM	3.89	! MMA	4	! AM	2.36	0	cytoplasmic	ASRA_up
NM_153679_at	Cpt1c	carnitine palmitoyltransferase 1c	9.83	P	7.56	P	8.43	P	2.27	0	cytoplasmic, multipass	ASRA_up
NM_010442_at	Hmox1	heme oxygenase (decycling) 1	11.47	P	9.21	P	10.14	P	2.25	0	cytoplasmic, type II	ASRA_up
NM_008046_at	Fst	follistatin	8.67	P	6.44	P	6.66	P	2.24	0	secreted	ASRA_up
NM_019413_at	Robo1	roundabout homolog 1 (Drosophila)	6.81	P	4.56	P	5.62	P	2.26	0	cytoplasmic, type II	ASRA_up
NM_008529_at	Ly6e	lymphocyte antigen 6 complex, locus E	10.22	P	8.05	P	7.83	! PA	2.17	0	secreted, type I	ASRA_up
NM_026428_at	Dcxr	dicarbonyl L-xylulose reductase	8.99	P	6.85	P	6.16	A	2.13	0	cytoplasmic	ASRA_up
NM_010786_at	Mdm2	transformed mouse 3T3 cell double minute 2	10.9	P	8.9	P	9.62	P	2	0	cytoplasmic	ASRA_up
NM_172647_at	F11r	F11 receptor	6.98	P	4.93	A	5.62	! MA	2.04	0	type I	ASRA_up
NM_177715_at	Kctd12	potassium channel tetramerisation domain containing 12	5.85	P	3.99	! PAP	3.54	A	1.86	0.001	cytoplasmic	ASRA_up
NM_145570_at	Fam176a	family with sequence similarity 176, member A	6.9	P	5.06	P	4.55	A	1.84	0.001	type II	ASRA_up
NM_013589_at	Ltbp2	latent transforming growth factor beta binding protein 2	10.6	P	8.8	P	7.97	P	1.8	0.001	secreted	ASRA_up
NM_013750_at	Phlda3	pleckstrin homology-like domain, family A, member 3	10.94	P	9.21	P	9.72	P	1.73	0.001	cytoplasmic	ASRA_up
NM_008393_at	Irx3	Iroquois related homeobox 3 (Drosophila)	10.1	P	8.4	P	8.12	P	1.7	0.001	cytoplasmic	ASRA_up
NM_183221_at	Fat4	FAT tumor suppressor homolog 4 (Drosophila)	8.12	P	6.47	P	6.72	P	1.65	0.002	cytoplasmic, secreted	ASRA_up
NM_029924_at	Mbd5	methyl-CpG binding domain protein 5	5.9	P	4.27	P	4.59	P	1.63	0.002	cytoplasmic	ASRA_up
NM_130861_at	Slco1a5	solute carrier organic anion transporter family, member 1a5	6.87	P	5.26	! PPA	5.27	! PA	1.6	0.003	multipass	ASRA_up
NM_010863_at	Myo1b	myosin IB	5.69	P	4.11	A	4.26	A	1.57	0.003	cytoplasmic	ASRA_up
NM_010226_at	Foxs1	forkhead box S1	7.06	P	5.49	A	5.58	A	1.56	0.003	cytoplasmic	ASRA_up
NM_007403_at	Adam8	a disintegrin and metallopeptidase domain 8	7.22	P	5.64	P	5.94	P	1.58	0.003	type I	ASRA_up
NM_145602_at	Ndrg4	N-myc downstream regulated gene 4	8.53	P	6.98	P	7.31	P	1.55	0.003	type II	ASRA_up
NM_028608_at	Glipr1	GLI pathogenesis-related 1 (glioma)	12.51	P	10.97	P	11	P	1.55	0.003	multipass	ASRA_up
NM_013560_at	Hspb1	heat shock protein 1	11.31	P	9.79	P	9.3	P	1.52	0.003	cytoplasmic	ASRA_up
NM_030712_at	Cxcr6	chemokine (C-X-C motif) receptor 6	5.69	P	4.15	! MAA	3.74	A	1.53	0.004	multipass	ASRA_up
NM_007729_at	Col11a1	collagen, type XI, alpha 1	5.44	P	3.89	! PAP	3.7	! PA	1.56	0.003	secreted	ASRA_up
NM_029083_at	Ddit4	DNA-damage-inducible transcript 4	10.63	P	9.18	P	9.22	P	1.45	0.004	cytoplasmic	ASRA_up
NM_001111287_at	Gm4659	predicted gene 4659	8.37	P	6.88	P	7.1	P	1.49	0.005	multipass	ASRA_up
NM_010118_at	Egr2	early growth response 2	6.72	P	5.26	! PPA	5.25	P	1.47	0.006	cytoplasmic	ASRA_up
NM_013473_at	Anxa8	annexin A8	8.29	P	6.92	P	6.87	P	1.37	0.006	cytoplasmic	ASRA_up
NM_028889_at	Efhd1	EF hand domain containing 1	5.64	P	4.25	! MPM	4.28	A	1.39	0.007	cytoplasmic	ASRA_up
NM_016762_at	Matn2	matrilin 2	7.27	P	5.91	P	5.46	P	1.36	0.007	secreted	ASRA_up
NM_020275_at	Tnfrsf10b	tumor necrosis factor receptor superfamily, member 10b	7.42	P	6.14	P	6.09	P	1.28	0.009	multipass	ASRA_up
NM_146162_at	Tmem119	transmembrane protein 119	7.91	P	6.63	! PPM	6.28	A	1.28	0.009	type I	ASRA_up
NM_030598_at	Rcan2	regulator of calcineurin 2	7.33	P	6.04	P	6.1	P	1.3	0.01	cytoplasmic	ASRA_up
NM_011111_at	Serpinb2	serine (or cysteine) peptidase inhibitor, clade B, member 2	9.64	P	8.25	P	7.68	P	1.39	0.01	cytoplasmic	ASRA_up
NM_153510_at	Pilra	paired immunoglobin-like type 2 receptor alpha	5.45	P	4.23	! PAP	4.25	A	1.23	0.011	type I, type II	ASRA_up
NM_001017983_at	Foxred2	FAD-dependent oxidoreductase domain containing 2	6.23	P	5	! PAP	4.84	A	1.23	0.011	cytoplasmic, secreted	ASRA_up
NM_013586_at	Loxl3	lysyl oxidase-like 3	9.87	P	8.66	P	8.22	P	1.22	0.011	secreted, type I	ASRA_up
NM_013743_at	Pdk4	pyruvate dehydrogenase kinase, isoenzyme 4	5.96	P	4.73	! PAP	4.1	! MA	1.23	0.011	cytoplasmic	ASRA_up
NM_028478_at	Rassf6	Ras association (RalGDS/AF-6) domain family member 6	7.2	P	6	! PMA	4.67	A	1.2	0.015	cytoplasmic	ASRA_up
NM_018887_at	Cyp39a1	cytochrome P450, family 39, subfamily a, polypeptide 1	5.96	P	4.81	P	4.76	! PA	1.16	0.016	multipass	ASRA_up
NM_024223_at	Crip2	cysteine rich protein 2	8.91	P	7.75	P	7.35	P	1.16	0.016	cytoplasmic	ASRA_up
NM_001039103_at	Rasa4	RAS p21 protein activator 4	8.05	P	6.93	P	6.89	! PA	1.13	0.017	cytoplasmic	ASRA_up
NM_011401_at	Slc2a3	solute carrier family 2 (facilitated glucose transporter), member 3	5.98	P	4.84	P	4.56	! PA	1.13	0.018	multipass	ASRA_up
NM_011864_at	Papss2	3'-phosphoadenosine 5'-phosphosulfate synthase 2	6.99	P	5.89	P	5.43	! PA	1.1	0.021	cytoplasmic	ASRA_up
NM_146008_at	Tcp11l2	t-complex 11 (mouse) like 2	8.41	P	7.31	P	6.91	P	1.11	0.021	cytoplasmic	ASRA_up
NM_023422_at	Hist1h2bc	histone cluster 1, H2bc	8.39	P	7.28	P	5.82	P	1.12	0.021	cytoplasmic	ASRA_up
NM_001033711_at	Evi2a	ecotropic viral integration site 2a	8.83	P	7.76	P	7.56	P	1.08	0.024	type I	ASRA_up
NM_010234_at	Fos	FBJ osteosarcoma oncogene	9.01	P	7.91	P	7.26	P	1.1	0.025	cytoplasmic	ASRA_up
NM_145852_at	Ropn1l	ropporin 1-like	6.34	P	5.27	! PPA	4.4	! MA	1.07	0.025	cytoplasmic	ASRA_up
NM_015776_at	Mfap5	microfibrillar associated protein 5	7.36	P	6.31	P	5.59	P	1.05	0.029	secreted	ASRA_up
NM_001102436_at	Acbd5	acyl-Coenzyme A binding domain containing 5	9.66	! MMM	8.61	! MMM	8.27	! MM	1.05	0.029	type II	ASRA_up
NM_029270_at	Arhgap24	Rho GTPase activating protein 24	7.14	P	6.16	P	5.94	P	0.99	0.033	cytoplasmic, type II	ASRA_up
NM_177157_at	Gchfr	GTP cyclohydrolase I feedback regulator	9.21	P	8.22	P	7.91	P	0.99	0.033	cytoplasmic	ASRA_up
NM_018827_at	Crlf1	cytokine receptor-like factor 1	9.85	P	8.81	P	7.88	P	1.04	0.033	cytoplasmic, secreted	ASRA_up
NM_008760_at	Ogn	osteoglycin	10.07	P	9	P	8.82	P	1.08	0.033	secreted	ASRA_up
NM_007621_at	Cbr2	carbonyl reductase 2	9.8	P	8.81	P	8.48	P	0.99	0.035	cytoplasmic	ASRA_up
NM_146249_at	BC031441	cDNA sequence BC031441	5.55	P	4.55	! PPA	3.99	P	0.99	0.04	cytoplasmic	ASRA_up
NM_013534_at	Leprel2	leprecan-like 2	7.89	P	6.97	P	6.55	P	0.92	0.042	cytoplasmic, secreted	ASRA_up
NM_053169_at	Trim16	tripartite motif-containing 16	8.21	P	7.28	P	7	P	0.92	0.042	cytoplasmic	ASRA_up
NM_001082536_at	Mkl1	MKL (megakaryoblastic leukemia)/myocardin-like 1	10.24	P	9.34	P	9.03	P	0.9	0.045	cytoplasmic	ASRA_up
NM_013759_at	Sepx1	selenoprotein X 1	10.43	P	9.54	P	8.99	P	0.89	0.048	cytoplasmic	ASRA_up
NM_001033208_at	Gcom1	GRINL1A complex locus	5.32	P	4.4	P	3.96	! AP	0.91	0.049	cytoplasmic	ASRA_up
ASRA_down (= A_down and B_down)
Probeset	Symbol	Name	Asym		Sym		p53Sym		FC	pfp	Localization
NM_011576_at	Tfpi	tissue factor pathway inhibitor	4.81	! APP	7.99	P	7.11	P	-3.19	0	secreted	ASRA_down
NM_009626_at	Adh7	alcohol dehydrogenase 7 (class IV), mu or sigma polypeptide	5.74	P	7.5	P	7.02	P	-1.76	0.001	cytoplasmic	ASRA_down
NM_175507_at	Tmem20	transmembrane protein 20	5.81	P	7.25	P	7.56	P	-1.43	0.001	multipass	ASRA_down
NM_009841_at	Cd14	CD14 antigen	8.08	P	9.35	P	9.94	P	-1.27	0.002	secreted	ASRA_down
NM_011638_at	Tfrc	transferrin receptor	7.51	P	8.74	P	8.79	P	-1.22	0.002	type II, multipass	ASRA_down
NM_010721_at	Lmnb1	lamin B1	8.91	P	9.71	P	10.35	P	-0.8	0.03	cytoplasmic	ASRA_down
NM_001083317_at	Slc35a4	solute carrier family 35, member A4	9.29	P	10.02	P	10.43	P	-0.74	0.047	multipass	ASRA_down
A_up
Probeset	Symbol	Name	Asym		Sym		p53Sym		FC	pfp	Localization
NM_008858_at	Prkd1	protein kinase D1	7.87	P	3.54	A	7.03	P	4.34	0	cytoplasmic	A_up
NM_025492_at	1700020L24Rik	RIKEN cDNA 1700020L24 gene	8.28	! MMM	4.68	A	8.04	! MM	3.6	0	cytoplasmic	A_up
NM_030595_at	Nbea	neurobeachin	7.02	P	4.14	! PAA	7.05	P	2.87	0	cytoplasmic, type II	A_up
NM_172294_at	Sulf1	sulfatase 1	8.78	P	6.13	P	8.89	P	2.65	0	secreted	A_up
NM_007494_at	Ass1	argininosuccinate synthetase 1	11.82	! MMM	9.27	! MMM	10.97	! MM	2.54	0	cytoplasmic	A_up
NM_001042613_at	Sepp1	selenoprotein P, plasma, 1	9.2	P	6.6	P	9.68	P	2.6	0.001	secreted	A_up
NM_010357_at	Gsta4	glutathione S-transferase, alpha 4	10.01	P	7.54	P	9.07	P	2.47	0	cytoplasmic	A_up
NM_001111026_at	Runx1t1	runt-related transcription factor 1; translocated to, 1 (cyclin D-related)	6.21	P	3.79	A	5.88	P	2.42	0	cytoplasmic, multipass	A_up
NM_001111027_at	Runx1t1	runt-related transcription factor 1; translocated to, 1 (cyclin D-related)	5.99	P	4.03	A	5.78	P	1.96	0	cytoplasmic, multipass	A_up
NM_153513_at	BC028528	cDNA sequence BC028528	6.99	P	4.66	A	6.05	P	2.33	0	secreted	A_up
NM_013509_at	Eno2	enolase 2, gamma neuronal	8.53	P	6.21	P	7.97	P	2.32	0	cytoplasmic	A_up
NM_175429_at	Kctd12b	potassium channel tetramerisation domain containing 12b	8.86	P	6.55	P	8.1	P	2.31	0	cytoplasmic	A_up
NM_008597_at	Mgp	matrix Gla protein	13.65	P	11.47	P	13.12	P	2.18	0	secreted	A_up
NM_025331_at	Gng11	guanine nucleotide binding protein (G protein), gamma 11	8.24	P	6.12	A	7.53	P	2.12	0	cytoplasmic	A_up
NM_053110_at	Gpnmb	glycoprotein (transmembrane) nmb	7.02	P	4.86	! APA	5.95	! PM	2.16	0	secreted, type I	A_up
NM_001113283_at	BC031353	cDNA sequence BC031353	7.01	P	5	! AAP	6.21	P	2.01	0	cytoplasmic	A_up
NM_172893_at	Parp12	poly (ADP-ribose) polymerase family, member 12	6.98	P	5.04	P	6.82	P	1.93	0.001	cytoplasmic	A_up
NM_019976_at	Psrc1	proline/serine-rich coiled-coil 1	8.63	P	6.66	P	7.81	P	1.97	0.001	cytoplasmic	A_up
NM_010726_at	Phyh	phytanoyl-CoA hydroxylase	8.55	P	6.75	P	7.54	P	1.8	0.001	cytoplasmic	A_up
NM_020568_at	Plin4	perilipin 4	7.57	P	5.76	A	7.08	! PM	1.8	0.001	cytoplasmic	A_up
NM_008538_at	Marcks	myristoylated alanine rich protein kinase C substrate	9.93	P	8.17	P	9.27	P	1.75	0.001	cytoplasmic	A_up
NM_009925_at	Col10a1	collagen, type X, alpha 1	6.3	P	4.56	A	5.12	A	1.74	0.001	secreted	A_up
NM_147778_at	Commd3	COMM domain containing 3	11.03	P	9.29	P	9.98	P	1.74	0.001	cytoplasmic	A_up
NM_029436_at	Klhl24	kelch-like 24 (Drosophila)	7.12	P	5.36	P	7.21	P	1.76	0.001	cytoplasmic	A_up
NM_026931_at	1810011O10Rik	RIKEN cDNA 1810011O10 gene	7.92	P	6.07	P	8.18	P	1.85	0.001	cytoplasmic	A_up
NM_031843_at	Dpp7	dipeptidylpeptidase 7	9.22	P	7.53	P	8.43	P	1.69	0.001	type I	A_up
NM_172574_at	Pqlc3	PQ loop repeat containing	8.21	P	6.51	P	7.12	P	1.7	0.001	multipass	A_up
NM_011459_at	Serpinb8	serine (or cysteine) peptidase inhibitor, clade B, member 8	7.3	P	5.57	! PPA	7.17	P	1.73	0.001	cytoplasmic	A_up
NM_009517_at	Zmat3	zinc finger matrin type 3	9.53	P	7.86	P	8.71	P	1.67	0.001	cytoplasmic	A_up
NM_001130458_at	Tcn2	transcobalamin 2	8.11	P	6.44	P	7.9	P	1.67	0.001	secreted	A_up
NM_009223_at	Snn	stannin	9.24	P	7.61	P	8.97	P	1.63	0.001	type II	A_up
NM_011670_at	Uchl1	ubiquitin carboxy-terminal hydrolase L1	7.05	P	5.4	P	7.2	P	1.65	0.002	cytoplasmic	A_up
NM_001007580_at	Fndc3c1	fibronectin type III domain containing 3C1	9.18	P	7.53	P	8.32	P	1.65	0.002	type II	A_up
NM_010444_at	Nr4a1	nuclear receptor subfamily 4, group A, member 1	9.51	P	7.88	P	8.41	P	1.63	0.002	cytoplasmic	A_up
NM_018764_at	Pcdh7	protocadherin 7	5.16	P	3.53	A	4.83	P	1.64	0.002	type I	A_up
NM_007652_at	Cd59a	CD59a antigen	7.41	P	5.8	! PPA	6.53	P	1.61	0.002	cytoplasmic, type I	A_up
NM_001111060_at	Cd59a	CD59a antigen	7.04	P	5.59	! APA	6.33	! AP	1.46	0.004	cytoplasmic, type I	A_up
NM_010930_at	Nov	nephroblastoma overexpressed gene	10.71	P	9.02	P	10.76	P	1.69	0.003	secreted	A_up
NM_178149_at	Pik3ip1	phosphoinositide-3-kinase interacting protein 1	8.78	P	7.09	P	8.38	P	1.7	0.002	type I, type II	A_up
NM_008663_at	Myo7a	myosin VIIA	6.57	P	4.96	A	6.62	P	1.61	0.003	cytoplasmic	A_up
NM_181848_at	Optn	optineurin	7.46	P	5.86	! PPA	7.1	P	1.6	0.003	cytoplasmic	A_up
NM_146040_at	Cdca7l	cell division cycle associated 7 like	7.14	P	5.57	A	7.93	! PM	1.57	0.003	cytoplasmic	A_up
NM_008113_at	Arhgdig	Rho GDP dissociation inhibitor (GDI) gamma	7.38	P	5.81	! PPA	6.59	P	1.56	0.003	cytoplasmic	A_up
NM_001081146_at	Prickle2	prickle-like 2 (Drosophila)	6.51	P	4.96	! MPA	6.04	! PA	1.56	0.003	cytoplasmic	A_up
NM_011189_at	Psme1	proteasome (prosome, macropain) 28 subunit, alpha	9.53	P	8.02	P	9.28	P	1.51	0.003	cytoplasmic	A_up
NM_010738_at	Ly6a	lymphocyte antigen 6 complex, locus A	11.76	P	10.09	P	11.18	P	1.67	0.003	type I	A_up
NM_144551_at	Trib2	tribbles homolog 2 (Drosophila)	6.35	P	4.8	P	6.94	P	1.55	0.003	cytoplasmic	A_up
NM_009510_at	Ezr	ezrin	11.53	P	10.02	P	11.57	P	1.51	0.003	cytoplasmic	A_up
NM_001145821_at	Ggta1	glycoprotein galactosyltransferase alpha 1, 3	7.39	P	5.87	P	6.36	P	1.52	0.004	type II	A_up
NM_007987_at	Fas	Fas (TNF receptor superfamily member 6)	6.98	! PPM	5.45	! PMA	6.19	A	1.53	0.003	cytoplasmic, type II	A_up
NM_173030_at	Galnt13	UDP-N-acetyl-alpha-D-galactosamine:polypeptide N-acetylgalactosaminyltransferase 13	6.91	P	5.37	P	6.14	P	1.53	0.004	type II	A_up
NM_178682_at	4933426M11Rik	RIKEN cDNA 4933426M11 gene	9.1	P	7.62	P	8.25	P	1.48	0.004	multipass	A_up
NM_178907_at	Mapkapk3	mitogen-activated protein kinase-activated protein kinase 3	8.68	P	7.2	P	8	P	1.48	0.004	cytoplasmic, type II	A_up
NM_178804_at	Slit2	slit homolog 2 (Drosophila)	10.08	P	8.6	P	10.41	P	1.48	0.004	cytoplasmic	A_up
XM_001479889_at	LOC100048267	Derived by automated computational analysis using gene prediction method: GNOMON. Supporting evidence includes similarity to: 1 EST	6.6	P	5.11	! APA	5.88	! AP	1.49	0.004	cytoplasmic	A_up
NM_181585_at	Pik3r3	phosphatidylinositol 3 kinase, regulatory subunit, polypeptide 3 (p55)	8.79	P	7.31	P	8.36	P	1.48	0.004	cytoplasmic	A_up
NM_010515_at	Igf2r	insulin-like growth factor 2 receptor	9.01	P	7.55	P	8.43	P	1.46	0.004	type I	A_up
NM_027040_at	1700007K13Rik	RIKEN cDNA 1700007K13 gene	5.56	P	4.06	A	4.63	A	1.5	0.004	cytoplasmic	A_up
NM_007680_at	Ephb6	Eph receptor B6	6.76	P	5.27	A	5.63	A	1.49	0.004	type I	A_up
NM_144916_at	Tmem150	transmembrane protein 150	8.23	P	6.79	! PPM	7.37	P	1.44	0.004	multipass	A_up
NM_134076_at	Abhd4	abhydrolase domain containing 4	9.74	P	8.27	P	8.67	P	1.47	0.004	cytoplasmic	A_up
NM_016923_at	Ly96	lymphocyte antigen 96	6.52	P	5.05	! PPM	6.07	P	1.47	0.004	secreted	A_up
NM_001159711_at	Ly96	lymphocyte antigen 96	6.59	P	5.08	! PPM	6.08	P	1.52	0.004	secreted	A_up
NM_022025_at	Slc5a7	solute carrier family 5 (choline transporter), member 7	6.95	P	5.42	! MAA	6.35	P	1.54	0.004	multipass	A_up
NM_015744_at	Enpp2	ectonucleotide pyrophosphatase/phosphodiesterase 2	7.71	P	6.17	P	8.58	P	1.54	0.004	type II	A_up
NM_001136077_at	Enpp2	ectonucleotide pyrophosphatase/phosphodiesterase 2	7.76	P	6.45	A	8.73	P	1.31	0.013	type II	A_up
NM_011977_at	Slc27a1	solute carrier family 27 (fatty acid transporter), member 1	8.55	P	7.09	! PPA	8.58	P	1.46	0.005	cytoplasmic, secreted	A_up
NM_054087_at	Slc19a2	solute carrier family 19 (thiamine transporter), member 2	8.41	P	6.97	P	7.26	P	1.44	0.004	multipass	A_up
NM_008409_at	Itm2a	integral membrane protein 2A	6.76	P	5.33	! PPA	6.23	P	1.43	0.005	type II	A_up
NM_001038015_at	Gnpda2	glucosamine-6-phosphate deaminase 2	5.4	P	3.97	A	5.72	P	1.44	0.005	cytoplasmic	A_up
NM_011729_at	Ercc5	excision repair cross-complementing rodent repair deficiency, complementation group 5	8.08	P	6.7	P	7.07	P	1.38	0.006	cytoplasmic, type II	A_up
XM_916287_at	LOC637082	Derived by automated computational analysis using gene prediction method: GNOMON. Supporting evidence includes similarity to: 2 mRNAs, 58 ESTs, 2 Proteins	8.13	P	6.74	! PPA	7.86	P	1.39	0.006	cytoplasmic	A_up
NM_001033293_at	Uap1l1	UDP-N-acteylglucosamine pyrophosphorylase 1-like 1	10.55	P	9.17	P	10.26	P	1.38	0.006	cytoplasmic	A_up
NM_054041_at	Antxr1	anthrax toxin receptor 1	10.74	P	9.37	P	9.73	P	1.36	0.006	type I, type II	A_up
NM_001113461_at	Tec	tec protein tyrosine kinase	7.63	P	6.27	! MAA	7.59	P	1.36	0.006	cytoplasmic	A_up
NM_001040684_at	Hsd3b7	hydroxy-delta-5-steroid dehydrogenase, 3 beta- and steroid delta-isomerase 7	6.76	P	5.38	P	5.83	P	1.38	0.006	cytoplasmic, multipass	A_up
NM_011825_at	Grem2	gremlin 2 homolog, cysteine knot superfamily (Xenopus laevis)	8.86	P	7.43	P	8.44	P	1.43	0.006	secreted	A_up
NM_019861_at	Ctsf	cathepsin F	7.18	P	5.82	A	6.19	A	1.36	0.006	cytoplasmic, secreted	A_up
NM_012031_at	Spag1	sperm associated antigen 1	6.5	P	5.04	! PAA	5.38	A	1.45	0.006	cytoplasmic	A_up
NM_001005863_at	Mtus1	mitochondrial tumor suppressor 1	6.37	P	5.01	P	5.27	P	1.36	0.006	cytoplasmic, type II	A_up
NM_001033636_at	Prex2	phosphatidylinositol-3,4,5-trisphosphate-dependent Rac exchange factor 2	5.03	P	3.67	! PPA	4.57	P	1.36	0.006	cytoplasmic	A_up
NM_007421_at	Adssl1	adenylosuccinate synthetase like 1	6.01	! APA	4.64	A	5.8	A	1.38	0.007	cytoplasmic	A_up
NM_027166_at	Ypel5	yippee-like 5 (Drosophila)	9.02	P	7.66	P	8.22	P	1.36	0.007	cytoplasmic	A_up
NM_007899_at	Ecm1	extracellular matrix protein 1	10.32	P	8.97	P	9.45	P	1.36	0.007	secreted	A_up
NM_146120_at	Gsn	gelsolin	12.48	P	11.13	P	11.71	P	1.35	0.007	cytoplasmic, secreted	A_up
NM_019753_at	Cdh17	cadherin 17	5.68	P	4.31	A	6.64	P	1.38	0.007	type I	A_up
NM_001001979_at	Megf10	multiple EGF-like-domains 10	6.26	! PPM	4.79	! PAA	5.63	! PA	1.47	0.007	type I	A_up
NM_183315_at	Ctxn1	cortexin 1	9.98	P	8.65	P	9.26	P	1.32	0.007	type II	A_up
XM_988868_at	LOC676300	Derived by automated computational analysis using gene prediction method: GNOMON. Supporting evidence includes similarity to: 3 mRNAs, 31 ESTs, 6 Proteins	7.53	P	6.09	P	7.04	P	1.44	0.007	multipass	A_up
NM_145133_at	Tifa	TRAF-interacting protein with forkhead-associated domain	8.11	P	6.78	! PPA	7.84	P	1.33	0.007	cytoplasmic	A_up
NM_013886_at	Hdgfrp3	hepatoma-derived growth factor, related protein 3	5.71	P	4.37	A	5.56	P	1.34	0.007	cytoplasmic	A_up
NM_017400_at	Sh3gl3	SH3-domain GRB2-like 3	7.64	P	6.28	! PPA	6.55	! PA	1.36	0.007	cytoplasmic	A_up
NM_021507_at	Sqrdl	sulfide quinone reductase-like (yeast)	9.6	P	8.24	P	9.15	P	1.36	0.007	cytoplasmic	A_up
NM_012048_at	Polk	polymerase (DNA directed), kappa	8.01	P	6.68	P	7.05	P	1.33	0.007	cytoplasmic	A_up
NM_009906_at	Tpp1	tripeptidyl peptidase I	9.8	P	8.47	P	9.41	P	1.34	0.007	cytoplasmic, secreted	A_up
NM_153098_at	Cd109	CD109 antigen	9.51	P	8.19	P	8.99	P	1.32	0.007	cytoplasmic, secreted	A_up
NM_148933_at	Slco4a1	solute carrier organic anion transporter family, member 4a1	6.88	P	5.58	! PAA	7.96	P	1.31	0.008	type II, multipass	A_up
NM_001039056_at	Kcnj15	potassium inwardly-rectifying channel, subfamily J, member 15	7.69	P	6.34	P	7.09	P	1.35	0.008	multipass	A_up
NM_009655_at	Alcam	activated leukocyte cell adhesion molecule	7.49	P	6.18	P	6.62	P	1.32	0.008	secreted, type I	A_up
NM_007486_at	Arhgdib	Rho, GDP dissociation inhibitor (GDI) beta	7.26	P	5.96	A	7.19	P	1.3	0.008	cytoplasmic	A_up
NM_010189_at	Fcgrt	Fc receptor, IgG, alpha chain transporter	8.25	P	6.95	P	7.29	P	1.3	0.008	type I	A_up
NM_030700_at	Maged2	melanoma antigen, family D, 2	9.56	P	8.24	P	8.9	P	1.32	0.008	cytoplasmic	A_up
NM_020003_at	0610031J06Rik	RIKEN cDNA 0610031J06 gene	10.7	P	9.41	P	10.79	P	1.29	0.008	type I	A_up
NM_019687_at	Slc22a4	solute carrier family 22 (organic cation transporter), member 4	5.47	! PPM	4.14	A	4.35	A	1.33	0.009	multipass	A_up
NM_027309_at	Lysmd2	LysM, putative peptidoglycan-binding, domain containing 2	6.67	A	5.4	A	6.38	A	1.27	0.009	cytoplasmic	A_up
NM_008182_at	Gsta2	glutathione S-transferase, alpha 2 (Yc2)	5.08	! PPA	3.61	A	4.82	P	1.47	0.009	cytoplasmic	A_up
NM_023143_at	C1ra	complement component 1, r subcomponent A	6.19	P	4.89	A	5.07	A	1.3	0.009	secreted	A_up
XM_001475499_at	LOC100046560	Derived by automated computational analysis using gene prediction method: GNOMON. Supporting evidence includes similarity to: 30 ESTs, 13 Proteins	9.58	P	8.29	P	8.94	P	1.29	0.009	cytoplasmic	A_up
NM_010387_at	H2-DMb1	histocompatibility 2, class II, locus Mb1	5.44	P	4.17	! PPA	4.41	A	1.28	0.009	type I	A_up
NM_001081279_at	Mfhas1	malignant fibrous histiocytoma amplified sequence 1	8.35	P	7.1	P	7.78	P	1.25	0.009	type II	A_up
NM_053267_at	Selm	selenoprotein M	10.99	P	9.74	P	10.24	P	1.25	0.01	cytoplasmic	A_up
NM_178111_at	Trp53inp2	transformation related protein 53 inducible nuclear protein 2	8.49	! MPM	7.25	A	8.05	! MM	1.24	0.01	cytoplasmic	A_up
NM_172691_at	B230312A22Rik	RIKEN cDNA B230312A22 gene	8.53	P	7.29	P	7.68	P	1.24	0.01	cytoplasmic	A_up
XR_035269_at	4930429B21Rik	Derived by automated computational analysis using gene prediction method: GNOMON. Supporting evidence includes similarity to: 2 mRNAs, 8 ESTs	5.56	P	4.31	! PAA	4.69	! PA	1.25	0.01	type II	A_up
XM_906857_at	LOC632664	Derived by automated computational analysis using gene prediction method: GNOMON. Supporting evidence includes similarity to: 48 ESTs, 2 Proteins	9.01	P	7.78	P	8.37	P	1.23	0.011	cytoplasmic	A_up
NM_178751_at	Orai2	ORAI calcium release-activated calcium modulator 2	7.66	P	6.39	! PPA	6.65	P	1.27	0.011	multipass	A_up
NM_198411_at	2610204M08Rik	RIKEN cDNA 2610204M08 gene	9.2	P	7.97	P	8.73	P	1.22	0.011	cytoplasmic, type II	A_up
XR_033249_at	LOC100047142	Derived by automated computational analysis using gene prediction method: GNOMON. Supporting evidence includes similarity to: 4 mRNAs, 61 ESTs, 7 Proteins	9.2	P	7.97	P	8.73	P	1.22	0.011	pseudogene	A_up
NM_026376_at	Plxnd1	plexin D1	8.37	P	7.15	P	7.3	P	1.22	0.011	cytoplasmic, type I	A_up
NM_008979_at	Ptpn22	protein tyrosine phosphatase, non-receptor type 22 (lymphoid)	7.66	P	6.33	P	7.18	P	1.33	0.011	cytoplasmic	A_up
NM_007635_at	Ccng2	cyclin G2	9.03	P	7.77	P	9.13	P	1.26	0.011	cytoplasmic	A_up
XM_001476518_at	LOC100046469	Derived by automated computational analysis using gene prediction method: GNOMON. Supporting evidence includes similarity to: 8 mRNAs, 134 ESTs, 8 Proteins	6.82	P	5.61	P	7.19	P	1.22	0.011	cytoplasmic	A_up
NM_001159536_at	Adcy3	adenylate cyclase 3	6.8	P	5.58	A	6.49	P	1.22	0.011	multipass	A_up
NM_027627_at	4931408A02Rik	RIKEN cDNA 4931408A02 gene	8.16	P	6.94	P	7.75	P	1.22	0.011	secreted, type II	A_up
NM_177340_at	Synpo	synaptopodin	7.04	P	5.8	P	6.78	P	1.24	0.011	cytoplasmic	A_up
NM_011452_at	Serpinb9b	serine (or cysteine) peptidase inhibitor, clade B, member 9b	7.03	P	5.77	! APA	6.96	! PM	1.25	0.011	cytoplasmic	A_up
NM_145508_at	Dyrk3	dual-specificity tyrosine-(Y)-phosphorylation regulated kinase 3	7.72	! PPM	6.49	A	7.94	! PM	1.23	0.011	cytoplasmic	A_up
NM_145619_at	Parp3	poly (ADP-ribose) polymerase family, member 3	8.01	P	6.8	P	7.27	P	1.2	0.011	cytoplasmic	A_up
XM_001473280_at	LOC100044897	Derived by automated computational analysis using gene prediction method: GNOMON. Supporting evidence includes similarity to: 64 ESTs, 10 Proteins	8.28	P	7.08	P	7.77	P	1.2	0.012	multipass	A_up
NM_172767_at	Vwa5a	von Willebrand factor A domain containing 5A	7.59	P	6.38	P	7.15	P	1.21	0.012	cytoplasmic	A_up
NM_153420_at	Acpl2	acid phosphatase-like 2	9.77	P	8.5	P	9.46	P	1.26	0.012	type II	A_up
XM_128949_at	2310002L13Rik	Derived by automated computational analysis using gene prediction method: GNOMON. Supporting evidence includes similarity to: 1 mRNA, 8 ESTs	5.98	! PPA	4.65	! MAA	6.16	! PA	1.33	0.012	type II	A_up
XM_001479990_at	LOC100048309	Derived by automated computational analysis using gene prediction method: GNOMON. Supporting evidence includes similarity to: 33 ESTs, 12 Proteins	5.4	P	4.13	! PPA	4.59	P	1.28	0.013	cytoplasmic	A_up
NM_146115_at	A830007P12Rik	RIKEN cDNA A830007P12 gene	8.11	P	6.91	P	7.34	P	1.2	0.013	cytoplasmic	A_up
NM_011173_at	Pros1	protein S (alpha)	7.79	P	6.58	P	6.78	P	1.21	0.013	secreted, type II	A_up
NM_009636_at	Aebp1	AE binding protein 1	10.6	P	9.42	P	9.82	P	1.18	0.013	cytoplasmic, secreted	A_up
NM_153559_at	Qsox2	quiescin Q6 sulfhydryl oxidase 2	8.1	P	6.93	P	7.05	P	1.17	0.014	secreted, type II, multipass	A_up
NM_009983_at	Ctsd	cathepsin D	11.24	P	10.07	P	10.86	P	1.18	0.014	secreted	A_up
NM_207204_at	Ninl	ninein-like	5.36	P	4.08	P	5.09	P	1.28	0.015	cytoplasmic	A_up
NM_009656_at	Aldh2	aldehyde dehydrogenase 2, mitochondrial	11.73	P	10.55	P	11.32	P	1.18	0.015	cytoplasmic	A_up
NM_026192_at	Calcoco1	calcium binding and coiled coil domain 1	7.96	P	6.78	P	7.21	P	1.18	0.015	cytoplasmic	A_up
NM_027760_at	Rassf8	Ras association (RalGDS/AF-6) domain family (N-terminal) member 8	4.85	! MMM	3.65	! MAA	3.79	! MM	1.21	0.015	cytoplasmic	A_up
NM_001037987_at	Edil3	EGF-like repeats and discoidin I-like domains 3	4.7	P	3.52	A	3.82	P	1.18	0.015	secreted	A_up
NM_007950_at	Ereg	epiregulin	10.22	P	8.98	P	9.29	P	1.24	0.015	type I	A_up
NM_001159394_at	Nfkbiz	nuclear factor of kappa light polypeptide gene enhancer in B-cells inhibitor, zeta	7.91	P	6.75	P	6.9	P	1.16	0.015	cytoplasmic	A_up
NM_016753_at	Lxn	latexin	10.22	P	9.02	P	9.64	P	1.2	0.015	cytoplasmic	A_up
NM_024263_at	Mxra8	matrix-remodelling associated 8	10.51	P	9.33	P	9.54	P	1.18	0.015	type I	A_up
NM_001080995_at	4632434I11Rik	RIKEN cDNA 4632434I11 gene	8.23	P	7.07	P	7.54	P	1.17	0.015	cytoplasmic, type II	A_up
NM_008006_at	Fgf2	fibroblast growth factor 2	6.5	P	5.26	! PAM	6.33	P	1.25	0.016	cytoplasmic	A_up
NM_026791_at	Fbxw9	F-box and WD-40 domain protein 9	8.18	P	7.02	A	7.1	! PA	1.16	0.016	cytoplasmic	A_up
NM_010358_at	Gstm1	glutathione S-transferase, mu 1	10.09	P	8.92	P	10.43	P	1.17	0.016	cytoplasmic	A_up
NM_028724_at	Rin2	Ras and Rab interactor 2	7.6	P	6.44	P	7.28	P	1.17	0.016	cytoplasmic	A_up
NM_194269_at	Morn2	MORN repeat containing 2	7.31	P	6.16	P	6.24	P	1.15	0.016	cytoplasmic	A_up
NM_001077411_at	Gba	glucosidase, beta, acid	9.65	P	8.49	P	9.24	P	1.15	0.016	secreted	A_up
NM_028705_at	Herc3	hect domain and RLD 3	6.44	P	5.28	P	5.61	P	1.16	0.017	cytoplasmic	A_up
NM_145450_at	BC022687	cDNA sequence BC022687	8.07	P	6.92	P	7.25	P	1.14	0.017	cytoplasmic	A_up
NM_010376_at	H13	histocompatibility 13	7.65	P	6.53	P	7.06	P	1.12	0.017	multipass	A_up
NM_001159551_at	H13	histocompatibility 13	7.16	P	6.06	P	6.57	P	1.1	0.02	multipass	A_up
NM_007527_at	Bax	BCL2-associated X protein	11.13	P	10.01	P	10.47	P	1.12	0.018	type II	A_up
NM_011580_at	Thbs1	thrombospondin 1	12.32	P	11.19	P	11.87	P	1.13	0.018	secreted	A_up
NM_026837_at	Tmem53	transmembrane protein 53	7.21	P	6.09	A	6.48	A	1.12	0.019	type II	A_up
NM_133234_at	Bbc3	BCL2 binding component 3	7.29	P	6.19	! APM	6.49	! PM	1.11	0.019	cytoplasmic	A_up
NM_019749_at	Gabarap	gamma-aminobutyric acid receptor associated protein	12.7	P	11.59	P	12.38	P	1.11	0.019	cytoplasmic	A_up
NM_172285_at	Plcg2	phospholipase C, gamma 2	6.54	P	5.44	A	5.69	A	1.1	0.019	cytoplasmic	A_up
NM_198425_at	Eid2	EP300 interacting inhibitor of differentiation 2	5.93	P	4.82	A	5.17	A	1.11	0.018	cytoplasmic	A_up
NM_178417_at	Zfp867	zinc finger protein 867	5.59	P	4.49	! PAA	4.55	! PM	1.1	0.018	cytoplasmic	A_up
NM_011116_at	Pld3	phospholipase D family, member 3	9.36	P	8.26	P	8.55	P	1.11	0.02	type II	A_up
NM_025808_at	Lztr1	leucine-zipper-like transcriptional regulator, 1	8.64	P	7.54	P	8.08	P	1.1	0.021	cytoplasmic	A_up
NM_023168_at	Grina	glutamate receptor, ionotropic, N-methyl D-aspartate-associated protein 1 (glutamate binding)	10.28	P	9.19	P	10.22	P	1.1	0.021	multipass	A_up
NM_029432_at	4930402H24Rik	RIKEN cDNA 4930402H24 gene	7.54	P	6.45	P	7.06	P	1.09	0.021	cytoplasmic	A_up
NM_144804_at	Depdc7	DEP domain containing 7	7.27	P	6.16	P	7.05	P	1.1	0.021	cytoplasmic	A_up
NM_029861_at	Cnrip1	cannabinoid receptor interacting protein 1	5.45	P	4.36	! APA	4.36	A	1.1	0.021	cytoplasmic	A_up
NM_001113424_at	Amn1	antagonist of mitotic exit network 1 homolog (S. cerevisiae)	7.88	P	6.79	P	7.39	P	1.09	0.021	cytoplasmic	A_up
NM_001083929_at	Gpx3	glutathione peroxidase 3	6.72	A	5.63	A	5.68	A	1.08	0.021	secreted	A_up
NM_009148_at	Exoc4	exocyst complex component 4	8.99	P	7.89	P	8.22	P	1.11	0.022	cytoplasmic	A_up
NM_011542_at	Tcea3	transcription elongation factor A (SII), 3	5.81	P	4.72	! AMA	4.99	A	1.09	0.022	cytoplasmic	A_up
NM_010893_at	Neu1	neuraminidase 1	7.89	P	6.81	P	7.65	P	1.08	0.023	secreted	A_up
NM_031177_at	Ift122	intraflagellar transport 122 homolog (Chlamydomonas)	6.82	P	5.74	P	5.94	P	1.08	0.023	cytoplasmic	A_up
NM_001038492_at	Ctsa	cathepsin A	9.21	P	8.14	P	9.1	P	1.07	0.024	secreted	A_up
NM_008452_at	Klf2	Kruppel-like factor 2 (lung)	9.23	P	8.18	P	8.38	P	1.05	0.025	cytoplasmic	A_up
NM_172770_at	Ttc12	tetratricopeptide repeat domain 12	6.22	P	5.17	! PPA	5.72	! MP	1.06	0.025	cytoplasmic	A_up
NM_133697_at	1110003E01Rik	RIKEN cDNA 1110003E01 gene	10.53	P	9.45	P	10.34	P	1.08	0.026	type II	A_up
NM_013760_at	Dnajb9	DnaJ (Hsp40) homolog, subfamily B, member 9	8.92	P	7.86	P	8.85	P	1.06	0.026	secreted	A_up
NM_133688_at	Lyrm5	LYR motif containing 5	8.94	P	7.88	P	8.03	P	1.06	0.026	cytoplasmic	A_up
NM_028281_at	Pcbd2	pterin 4 alpha carbinolamine dehydratase/dimerization cofactor of hepatocyte nuclear factor 1 alpha (TCF1) 2	8.4	P	7.34	P	8.45	P	1.06	0.026	cytoplasmic	A_up
NM_024217_at	Cmtm3	CKLF-like MARVEL transmembrane domain containing 3	9.72	P	8.66	P	10.03	P	1.06	0.026	multipass	A_up
NM_021439_at	Chst11	carbohydrate sulfotransferase 11	8.43	P	7.3	P	7.39	P	1.13	0.027	type II	A_up
NM_133754_at	Fblim1	filamin binding LIM protein 1	8.67	P	7.64	P	8.07	P	1.03	0.027	cytoplasmic	A_up
NM_153150_at	Slc25a1	solute carrier family 25 (mitochondrial carrier, citrate transporter), member 1	9.34	P	8.31	P	8.44	P	1.04	0.027	cytoplasmic	A_up
NM_013535_at	Grcc10	gene rich cluster, C10 gene	11.17	P	10.14	P	10.85	P	1.04	0.027	cytoplasmic	A_up
NM_177814_at	Erc2	ELKS/RAB6-interacting/CAST family member 2	5.92	P	4.89	! PAA	5.48	! PA	1.03	0.027	cytoplasmic	A_up
NM_001146153_at	Homer3	homer homolog 3 (Drosophila)	8.08	P	7.03	P	7.68	P	1.05	0.028	cytoplasmic	A_up
NM_030721_at	Acox3	acyl-Coenzyme A oxidase 3, pristanoyl	5.86	P	4.81	! APA	4.97	! PA	1.05	0.028	cytoplasmic	A_up
NM_010398_at	H2-T23	histocompatibility 2, T region locus 23	4.53	! AMM	3.48	! AMA	4.44	! MM	1.05	0.028	secreted, type I	A_up
NM_009318_at	Tapbp	TAP binding protein	9.07	P	8.04	P	9.06	P	1.03	0.027	type I	A_up
NM_001025313_at	Tapbp	TAP binding protein	9.05	P	8.03	P	9.05	P	1.01	0.029	type I	A_up
NM_009644_at	Ahrr	aryl-hydrocarbon receptor repressor	5.98	P	4.93	! AMA	5.56	! PA	1.04	0.028	cytoplasmic	A_up
NM_011434_at	Sod1	superoxide dismutase 1, soluble	11.41	P	10.38	P	11.11	P	1.02	0.028	cytoplasmic, type II	A_up
NM_001042534_at	Capg	capping protein (actin filament), gelsolin-like	10.84	P	9.81	P	10.19	P	1.03	0.029	cytoplasmic	A_up
NM_001130412_at	Lpin1	lipin 1	6.81	P	5.79	! PPA	6.31	P	1.02	0.029	cytoplasmic	A_up
NM_015761_at	Dos	downstream of Stk11	7.63	P	6.6	P	6.82	P	1.03	0.029	cytoplasmic	A_up
NM_026436_at	Tmem86a	transmembrane protein 86A	7.35	P	6.32	P	7.27	P	1.03	0.029	multipass	A_up
NM_175398_at	6530418L21Rik	RIKEN cDNA 6530418L21 gene	5.54	P	4.5	A	4.96	A	1.03	0.029	cytoplasmic	A_up
NM_008981_at	Ptprg	protein tyrosine phosphatase, receptor type, G	7.42	P	6.39	P	6.68	P	1.02	0.029	cytoplasmic, multipass	A_up
XR_035220_at	D330050I23Rik	Derived by automated computational analysis using gene prediction method: GNOMON. Supporting evidence includes similarity to: 6 mRNAs, 129 ESTs, 3 Proteins	6.26	P	5.22	! PMA	6.41	P	1.04	0.029	cytoplasmic	A_up
NM_001136088_at	Sh3bp2	SH3-domain binding protein 2	6.83	P	5.79	! PAA	6.63	P	1.04	0.029	cytoplasmic	A_up
NM_177688_at	H2afj	H2A histone family, member J	8.13	P	7.12	P	7.65	P	1.02	0.029	cytoplasmic	A_up
NM_008598_at	Mgmt	O-6-methylguanine-DNA methyltransferase	8.56	P	7.54	P	8.07	! PA	1.02	0.029	cytoplasmic	A_up
NM_181409_at	Mtmr11	myotubularin related protein 11	8.02	P	7.01	P	8	P	1.01	0.029	cytoplasmic	A_up
NM_025378_at	Ifitm3	interferon induced transmembrane protein 3	12.24	P	11.23	P	11.13	P	1.01	0.03	multipass	A_up
NM_011159_at	Prkdc	protein kinase, DNA activated, catalytic polypeptide	7.34	P	6.33	P	6.9	P	1	0.031	cytoplasmic	A_up
NM_013701_at	Ugt1a2	UDP glucuronosyltransferase 1 family, polypeptide A2	5.91	P	4.87	! PAA	6.1	P	1.04	0.031	type I	A_up
NM_145079_at	Ugt1a6a	UDP glucuronosyltransferase 1 family, polypeptide A6A	5.91	P	4.87	! PAA	6.1	P	1.04	0.031	type I	A_up
NM_201410_at	Ugt1a6b	UDP glucuronosyltransferase 1 family, polypeptide A6B	5.91	P	4.87	! PAA	6.1	P	1.04	0.031	type I	A_up
NM_201641_at	Ugt1a10	UDP glycosyltransferase 1 family, polypeptide A10	5.91	P	4.87	! PAA	6.1	P	1.04	0.031	multipass	A_up
NM_201642_at	Ugt1a7c	UDP glucuronosyltransferase 1 family, polypeptide A7C	5.91	P	4.87	! PAA	6.1	P	1.04	0.031	type I	A_up
NM_201643_at	Ugt1a5	UDP glucuronosyltransferase 1 family, polypeptide A5	5.91	P	4.87	! PAA	6.1	P	1.04	0.031	multipass	A_up
NM_201644_at	Ugt1a9	UDP glucuronosyltransferase 1 family, polypeptide A9	5.91	P	4.87	! PAA	6.1	P	1.04	0.031	type I, type II	A_up
NM_201645_at	Ugt1a1	UDP glucuronosyltransferase 1 family, polypeptide A1	5.91	P	4.87	! PAA	6.1	P	1.04	0.031	type I	A_up
NM_008576_at	Abcc1	ATP-binding cassette, sub-family C (CFTR/MRP), member 1	9.7	P	8.7	P	9.5	P	0.99	0.03	multipass	A_up
NM_133741_at	Snrk	SNF related kinase	8.43	! MMM	7.42	! MMM	7.55	! MA	1.02	0.03	type II	A_up
NM_197986_at	Tmem140	transmembrane protein 140	5.73	P	4.71	! PMA	5.55	P	1.02	0.03	multipass	A_up
XM_907047_at	D630023B12Rik	Derived by automated computational analysis using gene prediction method: GNOMON. Supporting evidence includes similarity to: 1 mRNA, 53 ESTs, 4 Proteins	9.02	P	8	P	9.1	P	1.03	0.03	type II	A_up
NM_175124_at	Lrrc28	leucine rich repeat containing 28	7.69	P	6.69	P	6.85	P	1.01	0.03	cytoplasmic	A_up
NM_013872_at	Pmm1	phosphomannomutase 1	9.75	P	8.75	P	8.75	P	1	0.031	cytoplasmic	A_up
NM_001142957_at	Gm4455	predicted gene 4455	9.16	P	8.13	P	8.74	P	1.04	0.031	cytoplasmic	A_up
NM_028149_at	Fbxl20	F-box and leucine-rich repeat protein 20	8.02	P	7.01	P	7.23	P	1.01	0.031	cytoplasmic	A_up
NM_176841_at	Ccdc88a	coiled coil domain containing 88A	8.51	P	7.47	P	8.11	P	1.04	0.031	cytoplasmic	A_up
XM_001002633_at	Wdr81	Derived by automated computational analysis using gene prediction method: GNOMON. Supporting evidence includes similarity to: 4 mRNAs, 134 ESTs, 4 Proteins	9.38	P	8.39	P	8.83	P	0.99	0.032	type II	A_up
NM_015728_at	Slc33a1	solute carrier family 33 (acetyl-CoA transporter), member 1	8.13	P	7.09	P	7.39	P	1.04	0.032	multipass	A_up
NM_008410_at	Itm2b	integral membrane protein 2B	12.16	P	11.16	P	11.68	P	1	0.032	cytoplasmic, type II	A_up
NM_009263_at	Spp1	secreted phosphoprotein 1	11.94	P	10.9	P	12.28	P	1.04	0.033	secreted	A_up
NM_023785_at	Ppbp	pro-platelet basic protein	7.18	P	6.15	P	7.55	P	1.03	0.033	secreted	A_up
NM_026619_at	Gsto2	glutathione S-transferase omega 2	5.25	P	4.26	A	6.31	P	0.99	0.033	cytoplasmic	A_up
NM_182927_at	Spred3	sprouty-related, EVH1 domain containing 3	6.62	P	5.64	! MPA	5.98	P	0.98	0.033	cytoplasmic	A_up
NM_001113527_at	Isg20	interferon-stimulated protein	6.95	P	5.97	A	7.33	P	0.98	0.033	cytoplasmic, type II	A_up
NM_001145801_at	Ctla2b	cytotoxic T lymphocyte-associated protein 2 beta	4.64	P	3.65	! PAA	5.57	P	0.99	0.033	cytoplasmic	A_up
NM_053177_at	Mcoln1	mucolipin 1	8.59	P	7.6	P	8.89	P	0.98	0.033	multipass	A_up
NM_009404_at	Tnfsf9	tumor necrosis factor (ligand) superfamily, member 9	6.98	P	5.99	P	6.55	P	0.99	0.033	type II	A_up
NM_025833_at	Baiap2l1	BAI1-associated protein 2-like 1	8.31	P	7.28	P	7.81	P	1.03	0.033	cytoplasmic	A_up
XM_905706_at	BC043476	Derived by automated computational analysis using gene prediction method: GNOMON. Supporting evidence includes similarity to: 3 mRNAs, 23 ESTs, 1 Protein	5.12	P	4.12	P	4.03	P	1.01	0.033	cytoplasmic	A_up
NM_011170_at	Prnp	prion protein	11.74	P	10.75	P	11.53	P	0.99	0.033	multipass	A_up
NM_013477_at	Atp6v0d1	ATPase, H+ transporting, lysosomal V0 subunit D1	11.09	P	10.12	P	10.18	P	0.98	0.033	cytoplasmic	A_up
NM_001081333_at	Plekhg4	pleckstrin homology domain containing, family G (with RhoGef domain) member 4	7.97	P	6.98	P	7.02	P	0.99	0.035	cytoplasmic	A_up
NM_001033238_at	Cblb	Casitas B-lineage lymphoma b	7.88	P	6.9	P	7.13	P	0.98	0.035	cytoplasmic	A_up
NM_145439_at	Tmc6	transmembrane channel-like gene family 6	5.39	P	4.4	! PAA	4.65	! PA	0.99	0.035	multipass	A_up
NM_026058_at	Lass4	LAG1 homolog, ceramide synthase 4	7.57	P	6.6	P	6.47	P	0.96	0.035	multipass	A_up
NM_153412_at	Phldb2	pleckstrin homology-like domain, family B, member 2	11.04	P	10.06	P	11.01	P	0.98	0.035	cytoplasmic	A_up
NM_019542_at	Nagk	N-acetylglucosamine kinase	8.57	P	7.6	P	8.19	P	0.97	0.035	cytoplasmic	A_up
NM_001033217_at	Prickle1	prickle like 1 (Drosophila)	5.6	P	4.6	A	5.57	! PM	1	0.035	cytoplasmic	A_up
NM_009667_at	Ampd3	adenosine monophosphate deaminase 3	7.65	P	6.68	P	6.95	P	0.97	0.035	cytoplasmic	A_up
NM_010386_at	H2-DMa	histocompatibility 2, class II, locus DMa	7.87	P	6.9	! PPM	7.57	P	0.97	0.035	type I	A_up
NM_207298_at	Cercam	cerebral endothelial cell adhesion molecule	6.83	P	5.85	P	6.04	! MP	0.98	0.036	secreted	A_up
NM_019472_at	Myo10	myosin X	10.01	P	9.03	P	9.99	P	0.97	0.036	cytoplasmic	A_up
NM_001001983_at	Pi4ka	phosphatidylinositol 4-kinase, catalytic, alpha polypeptide	9.33	P	8.37	P	9.26	P	0.96	0.036	cytoplasmic, type II	A_up
NM_008721_at	Npdc1	neural proliferation, differentiation and control gene 1	8.89	P	7.93	P	8.49	P	0.96	0.036	type I, type II	A_up
NM_009601_at	Chrnb1	cholinergic receptor, nicotinic, beta polypeptide 1 (muscle)	7.3	P	6.33	P	7.33	P	0.97	0.036	multipass	A_up
NM_026353_at	Slc48a1	solute carrier family 48 (heme transporter), member 1	9.95	P	8.98	P	9.81	P	0.96	0.036	multipass	A_up
NM_009676_at	Aox1	aldehyde oxidase 1	4.97	P	3.96	A	4.33	A	1.01	0.037	cytoplasmic	A_up
NM_026162_at	Plxdc2	plexin domain containing 2	5.34	P	4.39	A	4.55	! MA	0.95	0.037	type II	A_up
NM_173753_at	Fnip1	folliculin interacting protein 1	8.85	P	7.86	P	8.94	P	0.99	0.037	cytoplasmic	A_up
NM_018755_at	Pgcp	plasma glutamate carboxypeptidase	8.85	P	7.87	P	8.68	P	0.98	0.038	secreted, type I	A_up
NM_153091_at	St7l	suppression of tumorigenicity 7-like	8.23	P	7.26	P	7.66	P	0.97	0.038	multipass	A_up
NM_007670_at	Cdkn2b	cyclin-dependent kinase inhibitor 2B (p15, inhibits CDK4)	10.1	P	9.13	P	9.05	P	0.97	0.038	cytoplasmic	A_up
NM_008349_at	Il10rb	interleukin 10 receptor, beta	8.81	P	7.86	P	8.11	P	0.95	0.038	type I, type II	A_up
NM_010582_at	Itih2	inter-alpha trypsin inhibitor, heavy chain 2	9.29	P	8.29	P	8.86	P	1	0.038	secreted	A_up
NM_026823_at	Arl8a	ADP-ribosylation factor-like 8A	8.79	P	7.83	P	8.29	P	0.95	0.039	cytoplasmic	A_up
NM_177632_at	Fam43a	family with sequence similarity 43, member A	8.3	P	7.36	P	7.15	P	0.94	0.039	cytoplasmic	A_up
NM_010421_at	Hexa	hexosaminidase A	10.95	P	9.99	P	10.3	P	0.96	0.039	secreted	A_up
NM_001111312_at	Lrrfip1	leucine rich repeat (in FLII) interacting protein 1	8.42	P	7.47	P	7.73	P	0.95	0.039	cytoplasmic	A_up
NM_013546_at	Hebp1	heme binding protein 1	9.25	P	8.3	P	8.19	P	0.95	0.039	cytoplasmic	A_up
NM_001122830_at	Klhl26	kelch-like 26 (Drosophila)	9.53	P	8.59	! PPA	8.93	P	0.94	0.039	cytoplasmic	A_up
NM_008985_at	Ptprn	protein tyrosine phosphatase, receptor type, N	7.41	P	6.48	A	7.36	! MP	0.94	0.039	type I, type II	A_up
NM_007423_at	Afp	alpha fetoprotein	5.12	! PAP	3.67	A	3.81	! PA	1.45	0.039	secreted	A_up
XM_001475347_at	0610007N19Rik	Derived by automated computational analysis using gene prediction method: GNOMON. Supporting evidence includes similarity to: 1 mRNA, 38 ESTs	8.92	P	7.98	P	7.78	P	0.94	0.04	cytoplasmic	A_up
NM_001085371_at	Speg	SPEG complex locus	7.66	P	6.72	P	6.89	P	0.94	0.04	cytoplasmic	A_up
NM_010156_at	Samd9l	sterile alpha motif domain containing 9-like	6.61	P	5.65	P	6.79	P	0.95	0.04	cytoplasmic	A_up
NM_011227_at	Rab20	RAB20, member RAS oncogene family	6.35	P	5.39	P	6.13	! PM	0.96	0.04	cytoplasmic	A_up
NM_008127_at	Gjb4	gap junction protein, beta 4	6.71	P	5.78	P	6.55	P	0.94	0.04	multipass	A_up
NM_021320_at	Ntn4	netrin 4	7.09	! APP	6.14	A	6.2	A	0.95	0.04	secreted	A_up
NM_001111279_at	Wdfy1	WD repeat and FYVE domain containing 1	7.38	P	6.45	P	6.64	P	0.94	0.041	cytoplasmic	A_up
NM_133897_at	Lrrc8c	leucine rich repeat containing 8 family, member C	10.19	P	9.25	P	9.99	P	0.93	0.041	multipass	A_up
NM_133167_at	Parvb	parvin, beta	8.24	P	7.3	P	7.41	P	0.93	0.041	cytoplasmic, type II	A_up
NM_175445_at	Rassf2	Ras association (RalGDS/AF-6) domain family member 2	6.44	P	5.48	P	6.15	P	0.95	0.041	cytoplasmic	A_up
NM_011834_at	Aadat	aminoadipate aminotransferase	5.76	P	4.82	A	4.79	A	0.94	0.041	cytoplasmic	A_up
NM_025790_at	Acot13	acyl-CoA thioesterase 13	9.83	P	8.88	P	9.82	P	0.94	0.041	cytoplasmic	A_up
NM_007471_at	App	amyloid beta (A4) precursor protein	11.08	P	10.15	P	10.99	P	0.93	0.042	secreted, type I	A_up
NM_028803_at	Gbe1	glucan (1,4-alpha-), branching enzyme 1	6.46	P	5.51	! PPM	5.76	P	0.95	0.042	cytoplasmic	A_up
NM_021273_at	Ckb	creatine kinase, brain	9.34	! AMA	8.42	A	9.34	A	0.92	0.043	cytoplasmic	A_up
NM_001029855_at	Psme2	proteasome (prosome, macropain) 28 subunit, beta	11.28	! MMM	10.35	! MMM	11.16	! MM	0.92	0.043	cytoplasmic	A_up
NM_001034097_at	Tnfsf12-Tnfsf13	Tnfsf12-tnfsf13 readthrough transcript	5.7	P	4.75	! MPA	4.73	P	0.95	0.043	type II	A_up
NM_001159505_at	Tnfsf13	tumor necrosis factor (ligand) superfamily, member 13	5.7	P	4.75	! MPA	4.73	P	0.95	0.043	type II	A_up
NM_011026_at	P2rx4	purinergic receptor P2X, ligand-gated ion channel 4	8	P	7.08	P	7.97	P	0.92	0.043	multipass	A_up
NM_173444_at	Nbeal1	neurobeachin like 1	6.38	P	5.42	P	6.18	P	0.96	0.043	cytoplasmic	A_up
NM_001004150_at	A4galt	alpha 1,4-galactosyltransferase	5.87	A	4.95	A	5.26	A	0.93	0.043	type II	A_up
NM_181821_at	Hcfc1r1	host cell factor C1 regulator 1 (XPO1-dependent)	11.27	P	10.35	P	10.8	P	0.92	0.045	cytoplasmic	A_up
NM_172399_at	A930038C07Rik	RIKEN cDNA A930038C07 gene	6.09	P	5.13	! APP	6.28	P	0.96	0.045	cytoplasmic, secreted	A_up
NM_030066_at	Armcx1	armadillo repeat containing, X-linked 1	8.75	P	7.81	P	8.62	P	0.94	0.045	type II	A_up
NM_023122_at	Gpm6b	glycoprotein m6b	5.26	P	4.29	! PAA	4.14	A	0.97	0.045	cytoplasmic, multipass	A_up
NM_011019_at	Osmr	oncostatin M receptor	8.6	P	7.66	P	7.57	P	0.93	0.045	type I	A_up
NM_009804_at	Cat	catalase	9.59	P	8.66	P	9.07	P	0.93	0.045	cytoplasmic	A_up
NM_178406_at	Gpr153	G protein-coupled receptor 153	6.8	! PPA	5.89	A	6.19	A	0.91	0.045	multipass	A_up
NM_146067_at	Cpped1	Vcalcineurin-like phosphoesterase domain containing 1	7.99	P	7.06	! PPM	6.99	! PM	0.93	0.045	cytoplasmic	A_up
NM_001042558_at	Apaf1	apoptotic peptidase activating factor 1	7.96	P	7.05	P	6.92	P	0.91	0.045	cytoplasmic	A_up
NM_021565_at	Midn	midnolin	10.04	P	9.13	P	9.16	P	0.9	0.045	cytoplasmic	A_up
NM_172398_at	Akr1b10	aldo-keto reductase family 1, member B10 (aldose reductase)	9.01	P	8.09	P	8.67	P	0.92	0.046	cytoplasmic	A_up
NM_177333_at	Exoc3	exocyst complex component 3	9.08	P	8.16	P	9.26	P	0.92	0.047	cytoplasmic	A_up
NM_015760_at	Nox4	NADPH oxidase 4	5.61	P	4.7	P	5.14	P	0.91	0.047	multipass	A_up
NM_173408_at	Dcun1d3	DCN1, defective in cullin neddylation 1, domain containing 3 (S. cerevisiae)	7.92	P	7.01	P	7.29	P	0.91	0.048	cytoplasmic	A_up
NM_026522_at	Chid1	chitinase domain containing 1	6.39	P	5.48	P	6.19	P	0.9	0.048	secreted	A_up
NM_053262_at	Hsd17b11	hydroxysteroid (17-beta) dehydrogenase 11	8.08	P	7.17	P	7.33	P	0.91	0.048	type I, multipass	A_up
NM_001033409_at	Lgr6	leucine-rich repeat-containing G protein-coupled receptor 6	7.33	P	6.39	P	7.44	P	0.94	0.048	multipass	A_up
NM_001044741_at	Cacnb3	calcium channel, voltage-dependent, beta 3 subunit	9.7	P	8.79	P	9.37	P	0.9	0.048	cytoplasmic	A_up
NM_001122998_at	Tiam2	T-cell lymphoma invasion and metastasis 2	9.5	P	8.61	P	9.18	P	0.89	0.048	cytoplasmic	A_up
NM_019955_at	Ripk3	receptor-interacting serine-threonine kinase 3	9.88	P	8.99	P	9.67	P	0.89	0.048	cytoplasmic	A_up
NM_013657_at	Sema3c	sema domain, immunoglobulin domain (Ig), short basic domain, secreted, (semaphorin) 3C	9.12	P	8.2	P	8.57	P	0.92	0.049	secreted	A_up
NM_008329_at	Ifi204	interferon activated gene 204	4.85	P	3.9	! PPA	4.01	P	0.96	0.049	cytoplasmic	A_up
NM_025865_at	2310030G06Rik	RIKEN cDNA 2310030G06 gene	7.04	P	6.13	P	6.35	P	0.91	0.049	cytoplasmic	A_up
NM_011018_at	Sqstm1	sequestosome 1	12.54	P	11.65	P	12.32	P	0.9	0.05	cytoplasmic	A_up
NM_009853_at	Cd68	CD68 antigen	5.45	P	4.53	! PPA	4.31	P	0.92	0.05	type I	A_up
A_down
Probeset	Symbol	Name	Asym		Sym		p53Sym		FC	pfp	Localization
NM_010882_at	Ndn	necdin	3.86	! AAM	9.53	P	3.65	A	-5.66	0	type II	A_down
NM_025422_at	Cd302	CD302 antigen	4.39	! MPM	7.99	P	4.1	! PA	-3.6	0	type I, type II	A_down
NM_010101_at	S1pr3	sphingosine-1-phosphate receptor 3	4.88	! PPA	8.41	P	4.7	A	-3.53	0	multipass	A_down
NM_028133_at	Egln3	EGL nine homolog 3 (C. elegans)	4.23	! PAA	7	P	4.05	A	-2.77	0	cytoplasmic	A_down
NM_016674_at	Cldn1	claudin 1	4.28	! AAP	6.72	P	4.46	P	-2.44	0	multipass	A_down
NM_011859_at	Osr1	odd-skipped related 1 (Drosophila)	6.88	P	9.09	P	7.23	P	-2.21	0	cytoplasmic	A_down
NM_023537_at	Rab3b	RAB3B, member RAS oncogene family	5.65	A	7.8	P	5.78	A	-2.15	0	cytoplasmic	A_down
NM_021560_at	Bhlhe22	basic helix-loop-helix family, member e22	4.15	! PAA	6.27	P	4.09	! PA	-2.12	0	cytoplasmic	A_down
NM_145953_at	Cth	cystathionase (cystathionine gamma-lyase)	6.64	! MMM	8.6	P	5.63	A	-1.97	0.001	cytoplasmic	A_down
NM_198113_at	Ssh3	slingshot homolog 3 (Drosophila)	3.97	A	5.77	! PAM	4.22	A	-1.8	0.001	cytoplasmic	A_down
NM_134163_at	Mbnl3	muscleblind-like 3 (Drosophila)	3.98	! AAM	5.73	P	3.87	A	-1.75	0.001	cytoplasmic	A_down
NM_033325_at	Loxl2	lysyl oxidase-like 2	4.23	! AAM	6.02	P	4.3	A	-1.79	0.001	cytoplasmic, secreted	A_down
NM_010791_at	Meox1	mesenchyme homeobox 1	6.37	! PAM	8.13	P	5.38	A	-1.77	0.001	cytoplasmic	A_down
NM_015784_at	Postn	periostin, osteoblast specific factor	5.11	A	6.83	! PAP	5.35	A	-1.72	0.001	secreted	A_down
NM_001082975_at	Sdr39u1	short chain dehydrogenase/reductase family 39U, member 1	5.72	A	7.34	! PPM	6.47	A	-1.62	0.001	cytoplasmic	A_down
NM_019444_at	Ramp2	receptor (calcitonin) activity modifying protein 2	4.87	! PPA	6.49	P	4.26	A	-1.62	0.001	multipass	A_down
NM_019670_at	Diap3	diaphanous homolog 3 (Drosophila)	7.3	P	8.87	P	7.25	P	-1.57	0.001	cytoplasmic	A_down
NM_013496_at	Crabp1	cellular retinoic acid binding protein I	3.91	A	5.45	P	3.98	A	-1.54	0.001	cytoplasmic	A_down
NM_008652_at	Mybl2	myeloblastosis oncogene-like 2	6.14	! PAP	7.66	P	6.53	P	-1.52	0	cytoplasmic	A_down
NM_019804_at	B4galt4	UDP-Gal:betaGlcNAc beta 1,4-galactosyltransferase, polypeptide 4	5.39	P	6.86	P	4.59	A	-1.47	0	type II	A_down
NM_021451_at	Pmaip1	phorbol-12-myristate-13-acetate-induced protein 1	3.49	A	5.03	P	3.47	! AP	-1.54	0	cytoplasmic	A_down
NM_007806_at	Cyba	cytochrome b-245, alpha polypeptide	7.56	P	8.93	P	7.98	P	-1.37	0.001	multipass	A_down
XR_032055_at	LOC100045864	Derived by automated computational analysis using gene prediction method: GNOMON. Supporting evidence includes similarity to: 1 mRNA, 149 ESTs, 50 Proteins	5.44	P	6.82	P	5.78	! PA	-1.38	0.001	pseudogene	A_down
NM_001039181_at	Npr3	natriuretic peptide receptor 3	8.28	P	9.65	P	8.57	P	-1.36	0.001	cytoplasmic, type I	A_down
NM_008728_at	Npr3	natriuretic peptide receptor 3	8.24	P	9.6	P	8.52	P	-1.36	0.001	cytoplasmic, type I	A_down
NM_009627_at	Adm	adrenomedullin	6.23	P	7.68	P	6.27	P	-1.45	0.001	secreted	A_down
NM_010098_at	Opn3	opsin 3	6.84	A	8.19	! PAM	7.51	A	-1.35	0.001	multipass	A_down
NM_173400_at	Haus6	HAUS augmin-like complex, subunit 6	7.78	P	9.08	P	7.18	P	-1.3	0.001	cytoplasmic	A_down
NM_009369_at	Tgfbi	transforming growth factor, beta induced	5.58	P	6.91	P	4.53	! PA	-1.33	0.002	secreted	A_down
NM_026778_at	Cthrc1	collagen triple helix repeat containing 1	5.83	P	7.1	P	4.96	P	-1.28	0.002	secreted	A_down
NM_133990_at	Il13ra1	interleukin 13 receptor, alpha 1	4.26	P	5.52	P	4.5	P	-1.26	0.002	type I	A_down
NM_023579_at	Ipo5	importin 5	10.54	P	11.76	P	10.23	P	-1.23	0.002	cytoplasmic	A_down
NM_011252_at	Rbmx	RNA binding motif protein, X chromosome	6.76	P	7.99	P	7.25	P	-1.22	0.002	cytoplasmic	A_down
NM_001080967_at	Tmsb15b2	thymosin beta 15b2	3.77	A	5.03	! PPA	3.56	A	-1.26	0.002	cytoplasmic	A_down
NM_178396_at	Car12	carbonic anyhydrase 12	5.55	P	6.77	P	4.93	! MA	-1.22	0.002	secreted, type I	A_down
NM_024437_at	Nudt7	nudix (nucleoside diphosphate linked moiety X)-type motif 7	4.49	A	5.68	P	4.67	A	-1.2	0.002	cytoplasmic	A_down
NM_026047_at	Rnf219	ring finger protein 219	5.45	P	6.62	P	5.52	P	-1.17	0.002	cytoplasmic	A_down
NM_138744_at	Ssx2ip	synovial sarcoma, X breakpoint 2 interacting protein	6.6	P	7.78	P	7.1	P	-1.18	0.002	cytoplasmic	A_down
NM_008697_at	Nin	ninein	5.34	P	6.53	P	5.99	P	-1.19	0.002	cytoplasmic	A_down
NM_001111119_at	Ccnb1ip1	cyclin B1 interacting protein 1	4.23	! APA	5.38	! PAP	3.87	A	-1.16	0.002	cytoplasmic	A_down
NM_027263_at	Apitd1	apoptosis-inducing, TAF9-like domain 1	6.61	P	7.76	P	6.95	P	-1.14	0.002	cytoplasmic	A_down
NM_175265_at	6720463M24Rik	RIKEN cDNA 6720463M24 gene	7.22	P	8.36	P	6.63	! PM	-1.14	0.002	cytoplasmic	A_down
NM_007974_at	F2rl1	coagulation factor II (thrombin) receptor-like 1	5.05	A	6.23	P	5.11	A	-1.17	0.002	multipass	A_down
NM_025525_at	Rnf113a2	ring finger protein 113A2	4.87	! AAP	6.01	P	4.29	A	-1.13	0.002	cytoplasmic	A_down
NM_007855_at	Twist2	twist homolog 2 (Drosophila)	8.26	P	9.4	P	7.95	P	-1.13	0.002	cytoplasmic	A_down
NM_011057_at	Pdgfb	platelet derived growth factor, B polypeptide	5.84	P	6.96	P	5.85	P	-1.12	0.003	secreted	A_down
NM_001122958_at	Rad54l	RAD54 like (S. cerevisiae)	7.52	P	8.64	P	7.72	P	-1.12	0.003	cytoplasmic	A_down
NR_004445_at	Snord22	small nucleolar RNA, C/D box 22	7.78	P	8.91	P	8.27	P	-1.13	0.003	small nucleolar RNA	A_down
NM_177420_at	Psat1	phosphoserine aminotransferase 1	11.3	P	12.41	P	11.71	P	-1.11	0.003	cytoplasmic	A_down
NM_028315_at	Dis3	DIS3 mitotic control homolog (S. cerevisiae)	9.68	P	10.79	P	9.4	P	-1.11	0.003	cytoplasmic	A_down
NM_175643_at	Adamts2	a disintegrin-like and metallopeptidase (reprolysin type) with thrombospondin type 1 motif, 2	5.26	! AAM	6.42	! PPM	5.93	A	-1.16	0.003	secreted	A_down
NM_010573_at	Irx1	Iroquois related homeobox 1 (Drosophila)	4.16	A	5.29	! MPP	4.76	A	-1.13	0.003	type II	A_down
NM_011404_at	Slc7a5	solute carrier family 7 (cationic amino acid transporter, y+ system), member 5	9.64	P	10.8	P	9.45	P	-1.16	0.003	cytoplasmic, multipass	A_down
NM_170779_at	Wwc1	WW, C2 and coiled-coil domain containing 1	7.64	P	8.74	P	7.87	P	-1.1	0.004	cytoplasmic	A_down
NM_011284_at	Rpa2	replication protein A2	8.83	P	9.89	P	9.2	P	-1.06	0.005	cytoplasmic	A_down
NM_010353_at	Gsg2	germ cell-specific gene 2	6.38	P	7.44	P	6.86	P	-1.06	0.004	cytoplasmic	A_down
NM_001100449_at	Taf4b	TAF4B RNA polymerase II, TATA box binding protein (TBP)-associated factor	6.58	P	7.64	P	7.45	P	-1.06	0.004	cytoplasmic	A_down
NM_001081346_at	Rtkn2	rhotekin 2	6.84	P	7.92	P	7.12	P	-1.08	0.004	cytoplasmic	A_down
NM_001012273_at	Birc5	baculoviral IAP repeat-containing 5	10.35	P	11.41	P	11.02	P	-1.06	0.004	cytoplasmic	A_down
XR_032830_at	LOC100046666	Derived by automated computational analysis using gene prediction method: GNOMON. Supporting evidence includes similarity to: 12 ESTs, 2 Proteins	7.45	P	8.51	P	8.02	P	-1.05	0.004	pseudogene	A_down
NM_024184_at	Asf1b	ASF1 anti-silencing function 1 homolog B (S. cerevisiae)	8.63	P	9.68	P	9.34	P	-1.04	0.004	cytoplasmic	A_down
NM_009860_at	Cdc25c	cell division cycle 25 homolog C (S. pombe)	7.15	P	8.19	P	8.03	P	-1.04	0.005	cytoplasmic	A_down
NM_026560_at	Cdca8	cell division cycle associated 8	9.37	P	10.41	P	9.67	P	-1.04	0.005	cytoplasmic	A_down
NM_020577_at	As3mt	arsenic (+3 oxidation state) methyltransferase	4.15	! PAP	5.19	P	4.05	A	-1.04	0.005	cytoplasmic	A_down
NM_010140_at	Epha3	Eph receptor A3	3.63	! APA	4.67	P	3.58	A	-1.04	0.005	secreted, type I	A_down
NM_007801_at	Ctsh	cathepsin H	5.78	P	6.83	P	5.07	P	-1.05	0.005	secreted	A_down
NM_172756_at	Ankle1	ankyrin repeat and LEM domain containing 1	6.13	! AMA	7.16	P	6.65	! AM	-1.03	0.006	cytoplasmic	A_down
NM_172578_at	C79407	expressed sequence C79407	7.59	P	8.6	P	8.55	P	-1.02	0.006	cytoplasmic	A_down
NM_009728_at	Atp10a	ATPase, class V, type 10A	4.99	P	6	P	4.94	P	-1.01	0.006	multipass	A_down
NM_001110129_at	Ppih	peptidyl prolyl isomerase H	6.59	P	7.61	P	6.84	P	-1.02	0.006	cytoplasmic	A_down
NM_008638_at	Mthfd2	methylenetetrahydrofolate dehydrogenase (NAD+ dependent), methenyltetrahydrofolate cyclohydrolase	9.28	P	10.29	P	9.24	P	-1.01	0.006	secreted	A_down
XM_001473288_at	LOC100044675	Derived by automated computational analysis using gene prediction method: GNOMON. Supporting evidence includes similarity to: 1 mRNA, 2 ESTs, 5 Proteins	4.72	! PPA	5.75	P	5.11	A	-1.03	0.006	secreted	A_down
NM_001146292_at	Brunol4	bruno-like 4, RNA binding protein (Drosophila)	6.13	P	7.15	P	5.43	P	-1.02	0.007	cytoplasmic	A_down
NM_001146081_at	Fancb	Fanconi anemia, complementation group B	6.86	P	7.86	P	6.58	P	-1	0.007	cytoplasmic	A_down
NM_001081099_at	2610002D18Rik	RIKEN cDNA 2610002D18 gene	7.48	P	8.47	P	8.01	P	-1	0.007	cytoplasmic	A_down
NM_134082_at	Farp1	FERM, RhoGEF (Arhgef) and pleckstrin domain protein 1 (chondrocyte-derived)	10.58	P	11.58	P	10.3	P	-0.99	0.007	cytoplasmic	A_down
NM_009014_at	Rad51l1	RAD51-like 1 (S. cerevisiae)	4.91	P	5.9	P	5.25	! PM	-0.99	0.007	cytoplasmic	A_down
NM_001003898_at	Tardbp	TAR DNA binding protein	7.21	P	8.2	P	7.54	P	-0.99	0.007	cytoplasmic	A_down
NM_145556_at	Tardbp	TAR DNA binding protein	7.37	P	8.24	P	7.7	P	-0.88	0.018	cytoplasmic	A_down
NM_001003899_at	Tardbp	TAR DNA binding protein	7.23	P	8.2	P	7.58	P	-0.97	0.009	cytoplasmic	A_down
NM_008817_at	Peg3	paternally expressed 3	4.21	A	5.19	! PPA	4.42	A	-0.99	0.007	cytoplasmic	A_down
XR_035382_at	Marveld1	Derived by automated computational analysis using gene prediction method: GNOMON. Supporting evidence includes similarity to: 1 mRNA, 40 ESTs, 2 Proteins	4.72	! AAM	5.71	P	4.96	! PM	-1	0.007	multipass	A_down
NM_008017_at	Smc2	structural maintenance of chromosomes 2	6.83	P	7.89	P	7.53	P	-1.06	0.007	cytoplasmic, type II	A_down
NM_001081223_at	Rbbp8	retinoblastoma binding protein 8	7.53	P	8.51	P	8.07	P	-0.99	0.007	cytoplasmic	A_down
NM_178645_at	Blmh	bleomycin hydrolase	8.31	P	9.29	P	8.55	P	-0.98	0.007	cytoplasmic	A_down
NM_207267_at	Tmsb15b1-Tmsb15b2	Tmsb15b1-Tmsb15b2 readthrough transcript	3.9	A	4.95	P	3.74	A	-1.05	0.007	cytoplasmic	A_down
XM_986352_at	2810026P18Rik	Derived by automated computational analysis using gene prediction method: GNOMON. Supporting evidence includes similarity to: 34 ESTs	9.8	P	10.77	P	9.98	P	-0.97	0.008	cytoplasmic	A_down
NM_010022_at	Dbt	dihydrolipoamide branched chain transacylase E2	6.35	P	7.35	P	5.63	P	-1	0.009	cytoplasmic	A_down
NM_182928_at	Adm2	adrenomedullin 2	5.45	A	6.4	! PAA	5.49	A	-0.96	0.01	secreted	A_down
NM_011568_at	Thoc4	THO complex 4	10.54	P	11.49	P	10.59	P	-0.95	0.01	cytoplasmic	A_down
NM_020506_at	Xpo4	exportin 4	7.06	! MMM	8.01	! MMM	7.81	! MM	-0.95	0.01	cytoplasmic	A_down
NM_134142_at	Tmem109	transmembrane protein 109	8.59	P	9.54	P	8.98	P	-0.95	0.011	multipass	A_down
NM_172746_at	Hirip3	HIRA interacting protein 3	8.42	P	9.36	P	9	P	-0.94	0.011	cytoplasmic	A_down
NM_016692_at	Incenp	inner centromere protein	8.86	P	9.8	P	9.49	P	-0.94	0.011	cytoplasmic	A_down
NM_001034882_at	Gm5465	predicted gene 5465	3.95	! PAA	4.91	P	3.87	! AP	-0.96	0.011	cytoplasmic	A_down
NM_001122948_at	Tcfap2a	transcription factor AP-2, alpha	4.32	! AMA	5.27	P	4.69	A	-0.95	0.011	cytoplasmic	A_down
NM_001025779_at	Cdc6	cell division cycle 6 homolog (S. cerevisiae)	8.51	P	9.45	P	8.63	P	-0.94	0.012	cytoplasmic	A_down
NM_177342_at	Taf5	TAF5 RNA polymerase II, TATA box binding protein (TBP)-associated factor	7.53	P	8.45	P	7.57	P	-0.93	0.012	cytoplasmic	A_down
NM_178347_at	Cdc23	CDC23 (cell division cycle 23, yeast, homolog)	7.62	P	8.55	P	8.29	P	-0.93	0.013	cytoplasmic	A_down
XM_001473775_at	LOC100047577	Derived by automated computational analysis using gene prediction method: GNOMON. Supporting evidence includes similarity to: 3 mRNAs, 158 ESTs, 15 Proteins	9.19	P	10.11	P	9.6	P	-0.92	0.014	type II	A_down
NM_172779_at	Ddx26b	DEAD/H (Asp-Glu-Ala-Asp/His) box polypeptide 26B	6.7	P	7.62	P	6.5	P	-0.92	0.014	cytoplasmic, type II	A_down
NM_028242_at	Htatsf1	HIV TAT specific factor 1	9.23	P	10.16	P	9.27	P	-0.93	0.014	cytoplasmic	A_down
NM_146144_at	Usp1	ubiquitin specific peptidase 1	9.18	P	10.09	P	9.65	P	-0.92	0.014	cytoplasmic	A_down
NM_001040691_at	Ung	uracil DNA glycosylase	7.14	P	8.06	P	7.14	P	-0.92	0.014	cytoplasmic	A_down
NM_025582_at	2810405K02Rik	RIKEN cDNA 2810405K02 gene	5.24	A	6.16	P	5.33	A	-0.93	0.015	cytoplasmic	A_down
NM_010275_at	Gdnf	glial cell line derived neurotrophic factor	6.48	P	7.38	P	6.34	A	-0.91	0.015	secreted, type I	A_down
NM_144835_at	Heatr1	HEAT repeat containing 1	7.02	P	7.93	P	7.35	P	-0.91	0.015	cytoplasmic	A_down
NM_001139516_at	Rbl1	retinoblastoma-like 1 (p107)	6.21	P	7.16	P	6.59	P	-0.95	0.016	cytoplasmic	A_down
NM_023209_at	Pbk	PDZ binding kinase	9.53	P	10.43	P	10.46	P	-0.9	0.016	cytoplasmic	A_down
NM_134137_at	Lars	leucyl-tRNA synthetase	9.78	P	10.67	P	10.59	P	-0.9	0.016	cytoplasmic	A_down
NM_028760_at	Cep55	centrosomal protein 55	8.58	P	9.48	P	8.99	P	-0.9	0.016	cytoplasmic	A_down
NM_011514_at	Suv39h1	suppressor of variegation 3-9 homolog 1 (Drosophila)	8.46	P	9.35	P	8.98	P	-0.89	0.016	cytoplasmic	A_down
NM_028279_at	Naalad2	N-acetylated alpha-linked acidic dipeptidase 2	4.36	A	5.28	P	5.13	! AP	-0.91	0.016	cytoplasmic, type II	A_down
XM_001471788_at	LOC100044227	Derived by automated computational analysis using gene prediction method: BestRefseq. Supporting evidence includes similarity to: 1 mRNA	9.59	P	10.49	P	10.04	P	-0.9	0.016	cytoplasmic	A_down
NM_027204_at	Mrpl12	mitochondrial ribosomal protein L12	10.35	P	11.23	P	10.48	P	-0.89	0.016	cytoplasmic	A_down
NM_008987_at	Ptx3	pentraxin related gene	7.45	P	8.39	P	7.68	P	-0.94	0.017	secreted	A_down
NM_030143_at	Ddit4l	DNA-damage-inducible transcript 4-like	4.29	! PPA	5.18	P	4.35	! AP	-0.89	0.017	cytoplasmic	A_down
NM_029485_at	5133400G04Rik	RIKEN cDNA 5133400G04 gene	5.5	! APM	6.24	! PPM	5.18	A	-0.74	0.049	cytoplasmic	A_down
NM_027733_at	5133400G04Rik	RIKEN cDNA 5133400G04 gene	6.21	! MMM	7.1	! MMM	5.18	A	-0.89	0.017	cytoplasmic	A_down
NM_024250_at	Phf10	PHD finger protein 10	10.04	P	10.99	P	10	P	-0.95	0.017	cytoplasmic	A_down
NM_173763_at	Ccbl2	cysteine conjugate-beta lyase 2	5.83	P	6.72	P	6.19	! AM	-0.89	0.017	cytoplasmic	A_down
NM_145924_at	Cenpi	centromere protein I	8.08	P	8.97	P	8.56	P	-0.88	0.017	cytoplasmic, type II	A_down
NM_025866_at	Cdca7	cell division cycle associated 7	7.38	! MMM	8.29	! MMM	7.5	! MM	-0.91	0.017	cytoplasmic	A_down
NM_027394_at	Ube2cbp	ubiquitin-conjugating enzyme E2C binding protein	6.71	P	7.61	P	6.79	! MA	-0.9	0.017	cytoplasmic	A_down
NM_019703_at	Pfkp	phosphofructokinase, platelet	6.01	P	6.92	P	6.17	! PM	-0.9	0.017	cytoplasmic	A_down
NM_173762_at	Cenpe	centromere protein E	6.96	P	7.87	P	7.71	P	-0.91	0.018	cytoplasmic	A_down
NM_001002929_at	Nup85	nucleoporin 85	8.63	P	9.5	P	9.01	P	-0.87	0.018	cytoplasmic	A_down
NM_145443_at	L2hgdh	L-2-hydroxyglutarate dehydrogenase	7.49	P	8.38	P	7.58	! PA	-0.89	0.018	cytoplasmic	A_down
NM_013490_at	Chka	choline kinase alpha	7.55	P	8.45	P	7.9	P	-0.9	0.018	cytoplasmic	A_down
NM_011595_at	Timp3	tissue inhibitor of metalloproteinase 3	9.08	P	9.97	P	8.53	P	-0.89	0.018	secreted	A_down
NM_172605_at	Tdrd3	tudor domain containing 3	7.53	P	8.4	P	7.38	P	-0.87	0.018	cytoplasmic	A_down
NM_145706_at	Nup43	nucleoporin 43	8.82	P	9.69	P	8.7	P	-0.86	0.018	cytoplasmic	A_down
NM_133774_at	Stard4	StAR-related lipid transfer (START) domain containing 4	8.47	P	9.36	P	8.85	P	-0.89	0.018	cytoplasmic	A_down
XM_001481298_at	Wnk3	Derived by automated computational analysis using gene prediction method: GNOMON. Supporting evidence includes similarity to: 3 mRNAs, 29 ESTs, 8 Proteins	5.69	! PAP	6.61	! PPA	5.7	A	-0.93	0.019	cytoplasmic	A_down
NM_019428_at	Rpp30	ribonuclease P/MRP 30 subunit (human)	10.57	P	11.43	P	10.67	P	-0.87	0.018	cytoplasmic	A_down
NM_010818_at	Cd200	CD200 antigen	3.54	! AAP	4.42	! PAP	3.42	A	-0.88	0.019	type I	A_down
NM_170786_at	Cntf	ciliary neurotrophic factor	6.7	P	7.57	P	6.42	P	-0.86	0.019	cytoplasmic	A_down
NM_016768_at	Pbx3	pre B-cell leukemia transcription factor 3	7.02	! AMP	8.04	P	7.74	P	-1.02	0.019	cytoplasmic	A_down
NM_010104_at	Edn1	endothelin 1	6.54	! PPM	7.43	P	6.2	A	-0.89	0.019	cytoplasmic	A_down
NM_008566_at	Mcm5	minichromosome maintenance deficient 5, cell division cycle 46 (S. cerevisiae)	9.98	P	10.84	P	10.09	P	-0.86	0.019	cytoplasmic	A_down
NM_027930_at	Fam54a	family with sequence similarity 54, member A	7.26	! PPA	8.12	P	7.23	P	-0.86	0.019	cytoplasmic	A_down
NM_008893_at	Pola2	polymerase (DNA directed), alpha 2	9.02	P	9.88	P	9.74	P	-0.86	0.019	cytoplasmic	A_down
NM_134471_at	Kif2c	kinesin family member 2C	8.33	P	9.19	P	8.83	P	-0.86	0.019	cytoplasmic	A_down
NM_138745_at	Mthfd1	methylenetetrahydrofolate dehydrogenase (NADP+ dependent), methenyltetrahydrofolate cyclohydrolase, formyltetrahydrofolate synthase	9.11	P	9.96	P	9.22	P	-0.85	0.02	cytoplasmic	A_down
NM_022021_at	Cables1	CDK5 and Abl enzyme substrate 1	6.26	P	7.11	P	6.02	P	-0.85	0.021	cytoplasmic	A_down
NM_026209_at	1810063B07Rik	RIKEN cDNA 1810063B07 gene	6.82	P	7.68	P	6.44	P	-0.86	0.021	type II	A_down
NM_009387_at	Tk1	thymidine kinase 1	9.83	P	10.68	P	10.17	P	-0.86	0.022	cytoplasmic	A_down
NM_173396_at	Tgif2	TGFB-induced factor homeobox 2	6.19	A	7.05	A	6.61	A	-0.86	0.022	cytoplasmic	A_down
XM_001473812_at	LOC669787	Derived by automated computational analysis using gene prediction method: GNOMON. Supporting evidence includes similarity to: 1 Protein	4.56	P	5.42	P	3.91	A	-0.86	0.022	secreted	A_down
NM_009004_at	Kif20a	kinesin family member 20A	9.76	P	10.6	P	10.67	P	-0.84	0.022	cytoplasmic	A_down
NM_173866_at	Gpt2	glutamic pyruvate transaminase (alanine aminotransferase) 2	7.29	P	8.13	P	6.82	P	-0.84	0.023	cytoplasmic	A_down
NM_027101_at	Polr2d	polymerase (RNA) II (DNA directed) polypeptide D	8.68	P	9.52	P	7.94	P	-0.84	0.023	cytoplasmic	A_down
NM_001033966_at	Ak2	adenylate kinase 2	10.26	P	11.09	P	10.33	P	-0.83	0.024	cytoplasmic	A_down
NM_016895_at	Ak2	adenylate kinase 2	10.04	P	10.87	P	10.06	P	-0.83	0.024	cytoplasmic	A_down
NM_012055_at	Asns	asparagine synthetase	10.35	P	11.18	P	10.55	P	-0.83	0.024	cytoplasmic	A_down
NM_011155_at	Ppp5c	protein phosphatase 5, catalytic subunit	8.6	P	9.43	P	8.72	P	-0.83	0.024	cytoplasmic	A_down
NM_020265_at	Dkk2	dickkopf homolog 2 (Xenopus laevis)	7.69	P	8.54	P	7.94	P	-0.85	0.024	secreted	A_down
XM_001477790_at	LOC100047005	Derived by automated computational analysis using gene prediction method: GNOMON. Supporting evidence includes similarity to: 1 mRNA, 208 ESTs, 12 Proteins	10.04	P	10.87	P	10.06	P	-0.83	0.024	cytoplasmic	A_down
NM_146032_at	Srp68	signal recognition particle 68	9.61	P	10.43	P	9.66	P	-0.83	0.025	cytoplasmic	A_down
NM_026114_at	Eif2s1	eukaryotic translation initiation factor 2, subunit 1 alpha	7.31	P	8.16	P	6.79	P	-0.85	0.026	cytoplasmic	A_down
NM_001039474_at	Tcerg1	transcription elongation regulator 1 (CA150)	8.42	P	9.24	P	9.38	P	-0.83	0.026	cytoplasmic	A_down
NM_001039351_at	Nolc1	nucleolar and coiled-body phosphoprotein 1	9.4	P	10.23	P	9.53	P	-0.83	0.026	cytoplasmic	A_down
NM_011015_at	Orc1l	origin recognition complex, subunit 1-like (S.cereviaiae)	7.27	P	8.09	P	7.22	P	-0.83	0.026	cytoplasmic	A_down
NM_023908_at	Slco3a1	solute carrier organic anion transporter family, member 3a1	4.43	A	5.25	! AAM	4.76	A	-0.82	0.027	multipass	A_down
NM_026282_at	Spc24	SPC24, NDC80 kinetochore complex component, homolog (S. cerevisiae)	8.21	P	9.02	P	8.28	P	-0.82	0.027	cytoplasmic, secreted	A_down
XM_915679_at	2700023E23Rik	Derived by automated computational analysis using gene prediction method: GNOMON. Supporting evidence includes similarity to: 1 mRNA, 37 ESTs	8.13	P	8.96	P	7.58	P	-0.82	0.027	cytoplasmic	A_down
NM_029384_at	2210411K11Rik	RIKEN cDNA 2210411K11 gene	7.36	P	8.18	P	7.38	P	-0.82	0.028	multipass	A_down
NM_010723_at	Lmo4	LIM domain only 4	8.25	P	9.06	P	8.88	P	-0.8	0.028	cytoplasmic	A_down
NM_026344_at	Dph2	DPH2 homolog (S. cerevisiae)	7.12	P	7.95	P	7.14	P	-0.82	0.029	cytoplasmic	A_down
NM_207215_at	Mycbp2	MYC binding protein 2	7.23	P	8.05	P	7.06	P	-0.82	0.029	type II, multipass	A_down
XR_035298_at	1810032O08Rik	Derived by automated computational analysis using gene prediction method: GNOMON. Supporting evidence includes similarity to: 1 mRNA, 5 ESTs, 1 Protein	7.92	A	8.73	! PAP	8.5	A	-0.8	0.029	cytoplasmic	A_down
NM_144844_at	Pcca	propionyl-Coenzyme A carboxylase, alpha polypeptide	7.45	P	8.27	P	6.92	P	-0.81	0.029	cytoplasmic	A_down
NM_146234_at	Mmgt1	membrane magnesium transporter 1	8.97	P	9.78	P	9.17	P	-0.81	0.029	type I	A_down
NM_010615_at	Kif11	kinesin family member 11	8.23	P	9.05	P	9.14	P	-0.81	0.029	cytoplasmic	A_down
NM_001109661_at	Bach2	BTB and CNC homology 2	5.93	P	6.77	P	5.15	P	-0.84	0.03	cytoplasmic	A_down
NM_146208_at	Neil3	nei like 3 (E. coli)	6.3	P	7.09	P	6.76	! PM	-0.8	0.031	cytoplasmic	A_down
NR_027699_at	Serp2	stress-associated endoplasmic reticulum protein family member 2	6.24	P	7.04	P	6.75	P	-0.81	0.031	type II, multipass, cytoplasmic	A_down
NM_026410_at	Cdca5	cell division cycle associated 5	9.37	P	10.17	P	9.63	P	-0.8	0.031	cytoplasmic	A_down
NM_144861_at	Rprd1a	regulation of nuclear pre-mRNA domain containing 1A	6.99	P	7.8	P	7.04	! MA	-0.81	0.031	cytoplasmic	A_down
NM_028866_at	Wdr33	WD repeat domain 33	7.2	P	8.02	P	7.02	P	-0.82	0.031	cytoplasmic, multipass	A_down
NM_183046_at	Kif20b	kinesin family member 20B	7.55	P	8.36	P	8.05	P	-0.81	0.031	cytoplasmic	A_down
NM_009397_at	Tnfaip3	tumor necrosis factor, alpha-induced protein 3	7.61	P	8.44	P	7.7	P	-0.82	0.031	cytoplasmic	A_down
NM_019626_at	Cbln1	cerebellin 1 precursor protein	4.82	! PPM	5.66	P	4.86	! MA	-0.84	0.031	cytoplasmic, secreted	A_down
NM_001033528_at	Usp36	ubiquitin specific peptidase 36	6.69	P	7.49	P	6.81	P	-0.8	0.031	cytoplasmic	A_down
NM_001030307_at	Dkc1	dyskeratosis congenita 1, dyskerin homolog (human)	9.47	P	10.29	P	9.76	P	-0.81	0.031	type II	A_down
NM_010481_at	Hspa9	heat shock protein 9	10.38	P	11.17	P	11.35	P	-0.79	0.032	cytoplasmic	A_down
NM_173867_at	Rcc2	regulator of chromosome condensation 2	9.58	P	10.37	P	10.12	P	-0.79	0.032	cytoplasmic	A_down
NM_133654_at	Cd34	CD34 antigen	7.75	P	8.56	P	6.88	P	-0.81	0.032	type I	A_down
NM_144866_at	Etf1	eukaryotic translation termination factor 1	10.24	P	11.04	P	10.96	P	-0.8	0.032	cytoplasmic	A_down
NM_007854_at	Slc29a2	solute carrier family 29 (nucleoside transporters), member 2	5.24	! PPM	6.05	P	6.19	P	-0.81	0.033	multipass	A_down
NM_009272_at	Srm	spermidine synthase	10.65	! MMM	11.44	! MMM	9.97	! MM	-0.79	0.033	cytoplasmic	A_down
NM_008149_at	Gpam	glycerol-3-phosphate acyltransferase, mitochondrial	5.95	! APP	6.74	P	6.43	P	-0.79	0.033	type II	A_down
NM_028727_at	Nol9	nucleolar protein 9	7.53	P	8.33	P	7.92	P	-0.79	0.033	cytoplasmic	A_down
NM_001159599_at	Nol9	nucleolar protein 9	7.9	P	8.69	P	8.22	P	-0.79	0.034	cytoplasmic	A_down
NM_028777_at	Sec14l1	SEC14-like 1 (S. cerevisiae)	8.02	P	8.81	P	8.03	P	-0.79	0.033	cytoplasmic	A_down
NM_178113_at	Ncapd3	non-SMC condensin II complex, subunit D3	7.22	P	8.01	P	7.75	P	-0.8	0.034	cytoplasmic	A_down
NM_031196_at	Slc19a1	solute carrier family 19 (sodium/hydrogen exchanger), member 1	8.93	P	9.72	P	8.62	P	-0.79	0.034	cytoplasmic, multipass	A_down
NM_016750_at	H2afz	H2A histone family, member Z	10.58	! MMM	11.39	! MMM	11	! MM	-0.8	0.034	cytoplasmic	A_down
NM_021303_at	Noc2l	nucleolar complex associated 2 homolog (S. cerevisiae)	8.86	P	9.65	P	8.31	P	-0.79	0.034	cytoplasmic, type II, multipass	A_down
NM_009471_at	Umps	uridine monophosphate synthetase	8.49	P	9.28	P	8.61	P	-0.78	0.035	cytoplasmic	A_down
NM_027269_at	1110034A24Rik	RIKEN cDNA 1110034A24 gene	8.04	P	8.85	P	8.23	P	-0.81	0.035	cytoplasmic	A_down
NM_008234_at	Hells	helicase, lymphoid specific	9.72	P	10.51	P	9.93	P	-0.79	0.036	cytoplasmic	A_down
XM_990990_at	LOC676546	Derived by automated computational analysis using gene prediction method: GNOMON. Supporting evidence includes similarity to: 1 mRNA, 19 ESTs	6.74	P	7.53	P	6.18	! PM	-0.79	0.036	cytoplasmic	A_down
NM_021434_at	Gpr180	G protein-coupled receptor 180	8.57	P	9.35	P	8.01	P	-0.78	0.036	multipass	A_down
NM_172570_at	Trim47	tripartite motif-containing 47	8.37	P	9.16	P	8.13	P	-0.79	0.037	cytoplasmic	A_down
NM_023565_at	Cse1l	chromosome segregation 1-like (S. cerevisiae)	10.5	P	11.27	P	11.12	P	-0.78	0.037	cytoplasmic	A_down
NM_010790_at	Melk	maternal embryonic leucine zipper kinase	9.05	P	9.83	P	9.58	P	-0.77	0.037	type II	A_down
NM_010486_at	Elavl2	ELAV (embryonic lethal, abnormal vision, Drosophila)-like 2 (Hu antigen B)	5.88	P	6.67	P	6.58	P	-0.79	0.037	cytoplasmic	A_down
NM_001081077_at	Cwf19l1	CWF19-like 1, cell cycle control (S. pombe)	7.15	P	7.93	P	6.93	P	-0.77	0.037	cytoplasmic	A_down
NM_025954_at	Pgp	phosphoglycolate phosphatase	9.78	P	10.55	P	9.27	P	-0.77	0.037	cytoplasmic	A_down
NM_028006_at	Tube1	epsilon-tubulin 1	5.37	P	6.14	P	4.81	P	-0.78	0.037	cytoplasmic	A_down
NM_145468_at	Skp2	S-phase kinase-associated protein 2 (p45)	8.07	P	8.84	P	8.16	P	-0.78	0.038	cytoplasmic	A_down
NM_013787_at	Skp2	S-phase kinase-associated protein 2 (p45)	8.06	P	8.85	P	8.16	P	-0.79	0.037	cytoplasmic	A_down
NM_011081_at	Piga	phosphatidylinositol glycan anchor biosynthesis, class A	6.04	P	6.82	P	5.75	P	-0.78	0.037	type II	A_down
NM_184052_at	Igf1	insulin-like growth factor 1	5.96	A	6.73	! APP	6.3	A	-0.76	0.038	secreted, type I	A_down
NM_144860_at	Mib1	mindbomb homolog 1 (Drosophila)	6.65	P	7.42	P	7.39	P	-0.77	0.038	cytoplasmic	A_down
NR_027465_at	Wac	WW domain containing adaptor with coiled-coil	5.8	P	6.59	P	5.67	P	-0.79	0.038	cytoplasmic	A_down
NM_133362_at	Erdr1	erythroid differentiation regulator 1	12.67	P	13.45	P	12.73	P	-0.77	0.037	cytoplasmic	A_down
XM_001479823_at	Fbxl16	Derived by automated computational analysis using gene prediction method: GNOMON. Supporting evidence includes similarity to: 3 mRNAs, 31 ESTs, 4 Proteins	6.86	P	7.66	P	7.1	P	-0.79	0.038	cytoplasmic	A_down
NM_175122_at	Rab39b	RAB39B, member RAS oncogene family	5.95	P	6.71	P	5.66	P	-0.76	0.038	cytoplasmic	A_down
NM_009097_at	Rps6ka1	ribosomal protein S6 kinase polypeptide 1	4.56	A	5.34	A	4.44	A	-0.78	0.038	cytoplasmic	A_down
NM_178643_at	C230052I12Rik	RIKEN cDNA C230052I12 gene	7.49	P	8.26	P	7.58	P	-0.77	0.038	cytoplasmic	A_down
NM_001109747_at	2610036L11Rik	RIKEN cDNA 2610036L11 gene	8.46	P	9.24	P	8.06	P	-0.77	0.038	cytoplasmic	A_down
NM_027113_at	Wdr5b	WD repeat domain 5B	5.49	P	6.27	P	5.27	P	-0.78	0.038	cytoplasmic	A_down
NM_133878_at	Rcc1	regulator of chromosome condensation 1	8.39	P	9.17	P	8.27	P	-0.78	0.038	cytoplasmic	A_down
NM_012057_at	Irf5	interferon regulatory factor 5	5.61	! PAA	6.37	P	5.91	! AM	-0.77	0.038	cytoplasmic	A_down
NM_009171_at	Shmt1	serine hydroxymethyltransferase 1 (soluble)	7.9	P	8.67	P	8.69	P	-0.77	0.038	cytoplasmic	A_down
NM_023203_at	Dctpp1	dCTP pyrophosphatase 1	9.26	P	10.03	P	9.63	P	-0.76	0.038	cytoplasmic	A_down
NM_027460_at	Slc25a33	solute carrier family 25, member 33	8.32	P	9.08	P	8.05	P	-0.76	0.039	type II	A_down
NM_133722_at	Fam108c	family with sequence similarity 108, member C	8.66	P	9.42	P	8.98	P	-0.76	0.04	cytoplasmic	A_down
XM_001477942_at	LOC100047340	Derived by automated computational analysis using gene prediction method: GNOMON. Supporting evidence includes similarity to: 5 mRNAs, 328 ESTs, 4 Proteins	9.77	P	10.51	P	10.21	P	-0.75	0.041	cytoplasmic	A_down
NM_027667_at	Arhgap19	Rho GTPase activating protein 19	4.76	! APP	5.5	P	5.49	P	-0.75	0.042	cytoplasmic	A_down
NM_009672_at	Anp32a	acidic (leucine-rich) nuclear phosphoprotein 32 family, member A	7.91	P	8.67	P	7.97	P	-0.76	0.042	cytoplasmic	A_down
NR_024093_at	Zfp91-Cntf	Zfp91-Cntf readthrough transcript	6.75	P	7.5	P	6.55	P	-0.75	0.042	non-coding RNA	A_down
NM_019731_at	Nme4	non-metastatic cells 4, protein expressed in	6.25	A	7.01	P	6.12	A	-0.76	0.042	cytoplasmic	A_down
NM_008222_at	Hccs	holocytochrome c synthetase	8.55	P	9.31	P	8.34	P	-0.76	0.043	cytoplasmic	A_down
XM_984471_at	LOC675709	Derived by automated computational analysis using gene prediction method: GNOMON. Supporting evidence includes similarity to: 9 mRNAs, 159 ESTs, 20 Proteins	6.86	P	7.63	P	6.59	P	-0.76	0.043	type II	A_down
NM_001080926_at	Lrp8	low density lipoprotein receptor-related protein 8, apolipoprotein e receptor	6.98	P	7.73	P	7.14	P	-0.76	0.044	type I, type II	A_down
NM_145610_at	Ppan	peter pan homolog (Drosophila)	9.14	P	9.89	P	9.17	P	-0.74	0.044	type II	A_down
NM_025995_at	Fbxo5	F-box protein 5	9.73	P	10.49	P	10.13	P	-0.76	0.044	cytoplasmic	A_down
XR_035448_at	1500011K16Rik	Derived by automated computational analysis using gene prediction method: GNOMON. Supporting evidence includes similarity to: 1 Protein	8.18	P	8.92	P	8.22	P	-0.74	0.044	cytoplasmic	A_down
NM_001013368_at	E2f8	E2F transcription factor 8	6.73	P	7.48	P	7.09	P	-0.75	0.044	cytoplasmic	A_down
NM_008276_at	Hoxd8	homeo box D8	7.63	P	8.4	P	6.94	P	-0.77	0.045	cytoplasmic	A_down
NM_001042527_at	Blm	Bloom syndrome homolog (human)	7.35	P	8.09	P	7.81	P	-0.75	0.045	cytoplasmic	A_down
NR_003278_at	Rn18s	18S ribosomal RNA	5.83	P	7.46	P	6.4	P	-1.63	0.045	18S rRNA	A_down
NM_009226_at	Snrpd1	small nuclear ribonucleoprotein D1	10.44	P	11.2	P	10.58	P	-0.75	0.045	cytoplasmic	A_down
NM_133719_at	Metrn	meteorin, glial cell differentiation regulator	8.09	P	8.83	P	7.91	P	-0.74	0.045	cytoplasmic, secreted	A_down
NM_058214_at	Recql4	RecQ protein-like 4	6.59	P	7.33	P	6.48	P	-0.74	0.046	cytoplasmic, type II	A_down
NM_010258_at	Gata6	GATA binding protein 6	5.64	P	6.41	P	5.36	A	-0.76	0.045	cytoplasmic	A_down
XM_001474137_at	LOC100043998	Derived by automated computational analysis using gene prediction method: GNOMON. Supporting evidence includes similarity to: 1 mRNA, 94 ESTs, 1 Protein	8.21	P	9.03	P	8.97	P	-0.83	0.045	cytoplasmic	A_down
NM_008892_at	Pola1	polymerase (DNA directed), alpha 1	8.44	P	9.18	P	8.88	P	-0.74	0.045	cytoplasmic	A_down
NM_054048_at	Rcor2	REST corepressor 2	5.91	A	6.65	A	6.28	A	-0.73	0.046	cytoplasmic	A_down
NM_175542_at	Rttn	rotatin	6.39	P	7.14	P	6.61	! AM	-0.75	0.046	cytoplasmic, type II	A_down
NM_016777_at	Nasp	nuclear autoantigenic sperm protein (histone-binding)	7.97	P	8.71	P	8.13	P	-0.74	0.046	cytoplasmic	A_down
NM_007999_at	Fen1	flap structure specific endonuclease 1	10.22	P	10.96	P	10.81	P	-0.74	0.047	cytoplasmic	A_down
NM_001079824_at	Hnrnph3	heterogeneous nuclear ribonucleoprotein H3	8.12	P	8.85	P	8.23	P	-0.73	0.047	cytoplasmic	A_down
NM_172474_at	Tyw3	tRNA-yW synthesizing protein 3 homolog (S. cerevisiae)	5.39	P	6.15	P	6.36	P	-0.76	0.047	cytoplasmic	A_down
NM_029580_at	Trmt5	TRM5 tRNA methyltransferase 5 homolog (S. cerevisiae)	7.21	P	7.94	P	7.51	P	-0.73	0.048	cytoplasmic	A_down
NM_009873_at	Cdk6	cyclin-dependent kinase 6	6.39	P	7.16	P	6.01	P	-0.77	0.048	cytoplasmic	A_down
NM_027297_at	Prpf4	PRP4 pre-mRNA processing factor 4 homolog (yeast)	7.14	P	7.88	P	7.56	P	-0.74	0.049	cytoplasmic	A_down
NM_025527_at	Srp19	signal recognition particle 19	10.22	P	10.96	P	10.81	P	-0.74	0.048	cytoplasmic	A_down
NM_145465_at	Stk24	serine/threonine kinase 24 (STE20 homolog, yeast)	8.97	P	9.72	P	8.63	P	-0.75	0.049	cytoplasmic	A_down
NM_019499_at	Mad2l1	MAD2 mitotic arrest deficient-like 1 (yeast)	11.03	P	11.76	P	11.1	P	-0.73	0.049	cytoplasmic	A_down
NM_025427_at	1190002H23Rik	RIKEN cDNA 1190002H23 gene	3.77	! AAP	4.49	P	3.61	A	-0.72	0.049	cytoplasmic	A_down
NM_007513_at	Slc7a1	solute carrier family 7 (cationic amino acid transporter, y+ system), member 1	8.97	P	9.69	P	9.16	P	-0.73	0.05	multipass	A_down
B_up
Probeset	Symbol	Name	Asym		Sym		p53Sym		FC	pfp	Localization
NM_009610_at	Actg2	actin, gamma 2, smooth muscle, enteric	10.05	P	9.39	P	5.1	A	5	0	cytoplasmic	B_up
NM_001113515_at	Col2a1	collagen, type II, alpha 1	11.58	P	11.91	P	6.86	A	4.7	0.002	cytoplasmic, secreted	B_up
NM_009922_at	Cnn1	calponin 1	11.58	P	11.24	P	7.87	P	3.7	0	cytoplasmic	B_up
NM_009866_at	Cdh11	cadherin 11	10.35	P	9.56	P	7.17	P	3.2	0	type II	B_up
NM_011526_at	Tagln	transgelin	12.7	P	12.45	P	9.7	P	3	0	cytoplasmic	B_up
NM_011340_at	Serpinf1	serine (or cysteine) peptidase inhibitor, clade F, member 1	10.76	P	11.32	P	7.75	P	3	0	secreted	B_up
NM_001159518_at	Igfbp7	insulin-like growth factor binding protein 7	10.05	P	10.43	P	7.14	P	2.9	0	cytoplasmic	B_up
NM_031185_at	Akap12	A kinase (PRKA) anchor protein (gravin) 12	9.33	P	9.46	P	6.6	! PA	2.7	0	cytoplasmic	B_up
NM_008216_at	Has2	hyaluronan synthase 2	8.63	P	8.44	P	6.02	P	2.6	0	multipass	B_up
NM_026465_at	Prdxdd1	PrdX-deacylase domain 1	6.96	P	7.3	P	4.36	A	2.6	0	cytoplasmic	B_up
XM_194370_at	Adamtsl3	Derived by automated computational analysis using gene prediction method: GNOMON. Supporting evidence includes similarity to: 2 mRNAs, 15 ESTs, 6 Proteins	8.5	P	8.04	P	6.09	! AP	2.4	0	cytoplasmic	B_up
NM_153573_at	Fkbp14	FK506 binding protein 14	8.71	P	7.83	P	6.28	P	2.4	0	secreted	B_up
NM_009930_at	Col3a1	collagen, type III, alpha 1	8.8	P	9.07	P	6.38	P	2.4	0	secreted	B_up
NM_172486_at	Zfp677	zinc finger protein 677	6.44	! MMM	6.16	! MAA	4.17	! MA	2.3	0	cytoplasmic	B_up
NM_008695_at	Nid2	nidogen 2	8.16	P	7.93	P	5.87	P	2.3	0	secreted	B_up
NM_019631_at	Tmem45a	transmembrane protein 45a	8.46	P	7.67	P	6.21	P	2.2	0	multipass	B_up
NM_144810_at	Klhdc8a	kelch domain containing 8A	8.1	P	8.04	P	5.92	P	2.2	0	cytoplasmic	B_up
NM_007678_at	Cebpa	CCAAT/enhancer binding protein (C/EBP), alpha	7.31	P	7.71	P	5.15	A	2.2	0	cytoplasmic	B_up
NM_011957_at	Creb3l1	cAMP responsive element binding protein 3-like 1	7.85	P	8	P	5.73	A	2.1	0	type II	B_up
NM_153782_at	Fam20a	family with sequence similarity 20, member A	6.74	P	7.22	P	4.63	A	2.1	0	secreted	B_up
NM_001077694_at	Dysf	dysferlin	7.67	P	6.81	P	5.62	A	2.1	0.001	type II	B_up
NM_008381_at	Inhbb	inhibin beta-B	8.42	P	8.28	P	6.45	P	2	0.002	secreted	B_up
NM_001034962_at	Sorbs1	sorbin and SH3 domain containing 1	7.46	P	7.1	P	5.51	P	2	0.002	cytoplasmic	B_up
NM_144799_at	Lmcd1	LIM and cysteine-rich domains 1	8.09	P	7.62	P	6.09	A	2	0.001	cytoplasmic	B_up
NM_009616_at	Adam19	a disintegrin and metallopeptidase domain 19 (meltrin beta)	8.42	P	8.28	P	6.48	P	1.9	0.001	type I, type II	B_up
XM_001477025_at	LOC100041799	Derived by automated computational analysis using gene prediction method: GNOMON. Supporting evidence includes similarity to: 7 ESTs	5.8	A	5.99	! MMM	3.85	! MA	1.9	0.002	cytoplasmic	B_up
NM_011607_at	Tnc	tenascin C	10.48	P	10.59	P	8.51	P	2	0.002	secreted	B_up
NM_183116_at	1110021L09Rik	RIKEN cDNA 1110021L09 gene	7.81	P	7.97	P	5.89	P	1.9	0.002	type II, multipass	B_up
NM_019802_at	Ggcx	gamma-glutamyl carboxylase	7.23	P	6.35	P	5.28	! PA	2	0.002	multipass	B_up
NM_009200_at	Slc1a6	solute carrier family 1 (high affinity aspartate/glutamate transporter), member 6	6	! AAP	6.18	! APP	4.02	A	2	0.002	multipass	B_up
NM_054044_at	Gpr124	G protein-coupled receptor 124	7.24	P	7.97	P	5.36	A	1.9	0.002	multipass	B_up
NM_178929_at	Kazald1	Kazal-type serine peptidase inhibitor domain 1	6.36	P	6.29	P	4.46	A	1.9	0.003	secreted	B_up
NM_009670_at	Ank3	ankyrin 3, epithelial	7.28	P	6.94	P	5.46	P	1.8	0.004	cytoplasmic	B_up
NM_011706_at	Trpv2	transient receptor potential cation channel, subfamily V, member 2	7.86	P	7.18	P	6	! PA	1.9	0.003	multipass	B_up
NM_198860_at	AI646023	expressed sequence AI646023	8.1	P	7.91	P	6.22	P	1.9	0.003	cytoplasmic	B_up
NM_001039071_at	Ldb3	LIM domain binding 3	6.33	P	5.56	P	4.52	! PA	1.8	0.004	cytoplasmic	B_up
XM_001475886_at	LOC100046255	Derived by automated computational analysis using gene prediction method: GNOMON. Supporting evidence includes similarity to: 4 mRNAs, 24 ESTs, 14 Proteins	7.03	P	6.17	! PMP	5.25	A	1.8	0.004	cytoplasmic	B_up
NM_009413_at	Tpd52l1	tumor protein D52-like 1	8.31	P	7.95	P	6.57	P	1.7	0.005	cytoplasmic	B_up
NM_172051_at	Tmcc3	transmembrane and coiled coil domains 3	9.01	P	9.1	P	7.28	P	1.7	0.005	multipass	B_up
NM_013601_at	Msx2	homeobox, msh-like 2	7	P	6.15	! PMM	5.25	A	1.8	0.005	cytoplasmic	B_up
NM_026163_at	Pkp2	plakophilin 2	8.71	P	8.47	P	6.98	P	1.7	0.005	cytoplasmic	B_up
NM_001159533_at	Cacna1c	calcium channel, voltage-dependent, L type, alpha 1C subunit	7.87	P	7.57	P	6.17	P	1.7	0.006	cytoplasmic, multipass	B_up
NM_133187_at	1110032E23Rik	RIKEN cDNA 1110032E23 gene	8.29	P	8.07	P	6.58	P	1.7	0.006	cytoplasmic	B_up
NR_003642_at	2900062L11Rik	RIKEN cDNA 2900062L11 gene	6.58	P	7.08	P	4.9	P	1.7	0.006	type II	B_up
NM_021422_at	Dnaja4	DnaJ (Hsp40) homolog, subfamily A, member 4	6.49	P	6.06	P	4.79	A	1.7	0.006	cytoplasmic	B_up
NM_172900_at	Siglecg	sialic acid binding Ig-like lectin G	8.49	P	9.13	P	6.82	P	1.7	0.006	secreted, type I	B_up
NM_001085500_at	Cisd3	CDGSH iron sulfur domain 3	6.81	A	6.23	A	5.14	A	1.7	0.007	cytoplasmic	B_up
NM_144942_at	Csad	cysteine sulfinic acid decarboxylase	8.13	P	7.42	P	6.46	P	1.7	0.007	cytoplasmic	B_up
NM_026505_at	Bambi	BMP and activin membrane-bound inhibitor, homolog (Xenopus laevis)	6.51	P	6.22	P	4.84	A	1.7	0.007	type II	B_up
NM_201518_at	Flrt2	fibronectin leucine rich transmembrane protein 2	8.7	P	8.64	P	7.04	P	1.7	0.007	type I	B_up
NM_011581_at	Thbs2	thrombospondin 2	8.41	P	8.26	P	6.76	P	1.7	0.008	secreted	B_up
NM_008714_at	Notch1	Notch gene homolog 1 (Drosophila)	7.65	P	6.82	P	5.99	! AP	1.7	0.008	type I	B_up
NM_172465_at	Zdhhc9	zinc finger, DHHC domain containing 9	8.08	P	7.37	P	6.44	P	1.6	0.008	multipass	B_up
NM_011267_at	Rgs16	regulator of G-protein signaling 16	6.61	P	6.07	P	4.99	A	1.6	0.009	cytoplasmic	B_up
NM_007901_at	S1pr1	sphingosine-1-phosphate receptor 1	6.82	P	6.3	! PPM	5.19	A	1.6	0.01	multipass	B_up
NM_146131_at	Pbxip1	pre-B-cell leukemia transcription factor interacting protein 1	8.02	P	7.68	P	6.42	P	1.6	0.01	type II	B_up
NM_172508_at	Dse	dermatan sulfate epimerase	8.86	P	8.51	P	7.25	P	1.6	0.01	multipass	B_up
NM_172393_at	Aim1	absent in melanoma 1	6.96	P	7.22	! PAM	5.36	A	1.6	0.01	cytoplasmic	B_up
NM_025287_at	Spop	speckle-type POZ protein	10.12	P	10.7	P	8.52	P	1.6	0.01	cytoplasmic	B_up
NM_172637_at	Hectd2	HECT domain containing 2	6.46	P	6.21	P	4.88	P	1.6	0.011	cytoplasmic	B_up
XR_001805_at	EG665945	Derived by automated computational analysis using gene prediction method: GNOMON. Supporting evidence includes similarity to: 4 mRNAs, 68 ESTs, 9 Proteins	8.72	P	8.03	P	7.14	! PA	1.6	0.012	pseudogene	B_up
NM_130451_at	Slc2a10	solute carrier family 2 (facilitated glucose transporter), member 10	6.52	P	5.69	P	4.97	P	1.6	0.012	multipass	B_up
NM_001079908_at	Fgfr1	fibroblast growth factor receptor 1	8.29	P	7.62	P	6.73	P	1.6	0.012	cytoplasmic, secreted, type I	B_up
NM_009144_at	Sfrp2	secreted frizzled-related protein 2	10.66	P	11.29	P	9.09	P	1.6	0.012	secreted	B_up
NM_015786_at	Hist1h1c	histone cluster 1, H1c	8.21	P	7.4	P	6.67	P	1.5	0.014	cytoplasmic	B_up
NM_145379_at	Mrgprf	MAS-related GPR, member F	8.12	P	7.66	P	6.56	! PA	1.6	0.014	multipass	B_up
NM_178066_at	1110012D08Rik	RIKEN cDNA 1110012D08 gene	9.23	P	9.09	P	7.71	P	1.5	0.015	multipass	B_up
NM_001083316_at	Pdgfra	platelet derived growth factor receptor, alpha polypeptide	7.54	P	7.06	P	6.02	P	1.5	0.015	secreted, type I	B_up
NM_178761_at	Zfp672	zinc finger protein 672	7.98	P	7.4	P	6.47	P	1.5	0.015	cytoplasmic	B_up
NM_001081437_at	Fbln2	fibulin 2	11.56	P	11.69	P	10.04	P	1.5	0.015	secreted	B_up
NM_001040654_at	Cdkn2a	cyclin-dependent kinase inhibitor 2A	8.8	P	8.11	P	7.29	P	1.5	0.015	cytoplasmic, type II	B_up
NM_007742_at	Col1a1	collagen, type I, alpha 1	12.34	P	11.91	P	10.85	P	1.5	0.017	secreted	B_up
NM_172753_at	Csgalnact1	chondroitin sulfate N-acetylgalactosaminyltransferase 1	7.53	P	7.53	P	6.05	P	1.5	0.017	type II	B_up
NM_009504_at	Vdr	vitamin D receptor	6.52	P	6	P	5.06	A	1.5	0.017	cytoplasmic	B_up
XR_033476_at	LOC100047608	Derived by automated computational analysis using gene prediction method: GNOMON. Supporting evidence includes similarity to: 19 ESTs, 7 Proteins	8.34	! PAP	8.22	! AAP	6.88	A	1.5	0.018	pseudogene	B_up
NM_177595_at	Mkx	mohawk homeobox	6.44	P	6.68	P	4.98	P	1.5	0.018	cytoplasmic	B_up
NM_029999_at	Lbh	limb-bud and heart	7.74	P	7.05	P	6.26	P	1.5	0.018	cytoplasmic	B_up
NM_183254_at	1700025K23Rik	RIKEN cDNA 1700025K23 gene	7.12	P	7.21	P	5.66	! PA	1.5	0.018	cytoplasmic	B_up
NM_022814_at	Svep1	sushi, von Willebrand factor type A, EGF and pentraxin domain containing 1	7.29	P	7.54	P	5.81	A	1.5	0.018	secreted	B_up
NM_027154_at	Tmbim1	transmembrane BAX inhibitor motif containing 1	9.57	P	8.72	P	8.13	P	1.4	0.02	type II, multipass	B_up
XM_125636_at	Tysnd1	Derived by automated computational analysis using gene prediction method: GNOMON. Supporting evidence includes similarity to: 4 mRNAs, 102 ESTs, 5 Proteins	7.82	P	8.35	P	6.38	! PM	1.4	0.02	cytoplasmic	B_up
NM_175096_at	Stbd1	starch binding domain 1	7.89	P	7.95	P	6.46	P	1.4	0.019	secreted	B_up
NM_019707_at	Cdh13	cadherin 13	7.61	P	6.72	P	6.19	P	1.4	0.019	secreted, type I	B_up
NM_001143776_at	Fam13c	family with sequence similarity 13, member C	5.86	P	5.52	P	4.41	P	1.5	0.02	cytoplasmic	B_up
XM_001478817_at	LOC100047749	Derived by automated computational analysis using gene prediction method: GNOMON. Supporting evidence includes similarity to: 38 ESTs, 4 Proteins	7.86	P	7.67	P	6.44	! PM	1.4	0.019	cytoplasmic	B_up
NM_138315_at	Mical1	microtubule associated monoxygenase, calponin and LIM domain containing 1	8.23	P	7.95	P	6.81	P	1.4	0.019	cytoplasmic	B_up
NM_010478_at	Hspa1b	heat shock protein 1B	9.64	P	9.25	P	8.22	P	1.4	0.019	cytoplasmic	B_up
NM_028454_at	Tm7sf2	transmembrane 7 superfamily member 2	8.21	P	7.93	P	6.77	P	1.4	0.019	type I, multipass	B_up
NM_009933_at	Col6a1	collagen, type VI, alpha 1	10.19	P	9.78	P	8.77	P	1.4	0.019	cytoplasmic, secreted	B_up
NM_181390_at	Mustn1	musculoskeletal, embryonic nuclear protein 1	8.22	P	7.42	P	6.8	P	1.4	0.019	cytoplasmic	B_up
NM_009640_at	Angpt1	angiopoietin 1	7.25	P	7	P	5.79	P	1.5	0.019	secreted	B_up
NM_028472_at	Bmper	BMP-binding endothelial regulator	6.92	P	7.48	P	5.5	P	1.4	0.02	cytoplasmic, secreted	B_up
NM_011824_at	Grem1	gremlin 1	8.04	P	7.78	P	6.62	P	1.4	0.02	secreted, type II	B_up
NM_145978_at	Pdlim2	PDZ and LIM domain 2	9.59	P	8.96	P	8.15	P	1.4	0.02	cytoplasmic	B_up
NM_053106_at	Lmod1	leiomodin 1 (smooth muscle)	7.35	! PMP	6.63	A	5.91	A	1.4	0.02	cytoplasmic	B_up
NM_198625_at	Mtss1l	metastasis suppressor 1-like	6.41	P	5.79	! PPA	5.01	A	1.4	0.02	cytoplasmic	B_up
NM_009003_at	Rab4a	RAB4A, member RAS oncogene family	7.48	P	7.23	P	6.09	P	1.4	0.02	cytoplasmic	B_up
NM_001111324_at	Nedd9	neural precursor cell expressed, developmentally down-regulated gene 9	7.13	P	6.55	P	5.72	P	1.4	0.021	cytoplasmic	B_up
NM_001079844_at	Gpc6	glypican 6	6.91	P	7.04	P	5.51	P	1.4	0.021	secreted	B_up
XM_001473254_at	LOC100045283	Derived by automated computational analysis using gene prediction method: GNOMON. Supporting evidence includes similarity to: 6 mRNAs, 74 ESTs, 7 Proteins	6.91	P	7.04	P	5.51	P	1.4	0.021	secreted	B_up
NM_183312_at	Synm	synemin, intermediate filament protein	6.04	P	5.31	P	4.63	P	1.4	0.021	cytoplasmic	B_up
NM_146007_at	Col6a2	collagen, type VI, alpha 2	9.59	P	9.38	P	8.2	P	1.4	0.021	secreted	B_up
NM_001145887_at	Tiam1	T-cell lymphoma invasion and metastasis 1	8.73	P	8.14	P	7.36	P	1.4	0.024	cytoplasmic	B_up
NM_029770_at	Unc5b	unc-5 homolog B (C. elegans)	10.19	P	9.5	P	8.81	P	1.4	0.024	type I	B_up
NM_001083810_at	Prr5l	proline rich 5 like	6.29	P	5.92	P	4.92	! PA	1.4	0.024	cytoplasmic	B_up
NM_023132_at	Renbp	renin binding protein	8.66	P	8.31	P	7.27	A	1.4	0.024	cytoplasmic	B_up
NM_178679_at	Zfp365	zinc finger protein 365	7.92	P	7.25	P	6.55	P	1.4	0.024	cytoplasmic	B_up
NM_010917_at	Nid1	nidogen 1	8.82	P	9.18	P	7.47	P	1.3	0.025	type I	B_up
NM_010070_at	Dok1	docking protein 1	10.69	P	10.26	P	9.34	P	1.4	0.025	cytoplasmic	B_up
NM_008803_at	Pde8a	phosphodiesterase 8A	5.78	P	5.76	P	4.42	! MA	1.4	0.025	cytoplasmic	B_up
NM_026840_at	Pdgfrl	platelet-derived growth factor receptor-like	9	P	8.51	P	7.64	P	1.4	0.025	secreted	B_up
NM_001122892_at	Fyn	Fyn proto-oncogene	9.98	P	10.03	P	8.65	P	1.3	0.026	cytoplasmic	B_up
NM_001105246_at	Pcdh19	protocadherin 19	8.98	P	9.29	P	7.63	P	1.4	0.025	type I, type II, multipass	B_up
NM_001105245_at	Pcdh19	protocadherin 19	8.7	P	9.03	P	7.45	P	1.2	0.037	type I, type II, multipass	B_up
XM_887910_at	A930035D04Rik	Derived by automated computational analysis using gene prediction method: GNOMON. Supporting evidence includes similarity to: 1 mRNA, 22 ESTs, 1 Protein	6.01	P	5.98	P	4.66	P	1.3	0.025	cytoplasmic	B_up
NM_173733_at	Suox	sulfite oxidase	7.62	P	7.62	P	6.28	P	1.3	0.026	cytoplasmic	B_up
NM_026268_at	Dusp6	dual specificity phosphatase 6	11.39	P	10.47	P	10.04	P	1.3	0.026	cytoplasmic	B_up
NM_007792_at	Csrp2	cysteine and glycine-rich protein 2	10.27	P	10.59	P	8.95	P	1.3	0.026	cytoplasmic	B_up
NM_020561_at	Smpdl3a	sphingomyelin phosphodiesterase, acid-like 3A	5.41	! AMA	5.69	! PMM	4.06	A	1.3	0.026	secreted	B_up
NM_027533_at	Tspan2	tetraspanin 2	7.86	P	7.27	P	6.54	P	1.3	0.026	multipass	B_up
NM_177846_at	Lcmt2	leucine carboxyl methyltransferase 2	6.12	P	5.59	! APP	4.79	A	1.3	0.026	cytoplasmic, secreted	B_up
NM_019877_at	Copz2	coatomer protein complex, subunit zeta 2	8.92	P	8.37	P	7.57	P	1.3	0.026	type II	B_up
NM_172118_at	Myl9	myosin, light polypeptide 9, regulatory	12.88	P	12.78	P	11.56	P	1.3	0.026	cytoplasmic	B_up
NM_025855_at	Echdc1	enoyl Coenzyme A hydratase domain containing 1	8.68	P	8.79	P	7.36	P	1.3	0.026	cytoplasmic	B_up
NM_177429_at	Ofd1	oral-facial-digital syndrome 1 gene homolog (human)	6.99	P	6.98	P	5.67	P	1.3	0.027	cytoplasmic	B_up
NM_026166_at	1200009F10Rik	RIKEN cDNA 1200009F10 gene	9.78	P	8.89	P	8.47	P	1.3	0.028	cytoplasmic, type II	B_up
NM_201239_at	Rnase4	ribonuclease, RNase A family 4	6.5	P	5.91	P	5.11	! PA	1.4	0.028	secreted	B_up
NM_001037098_at	Nacc2	nucleus accumbens associated 2, BEN and BTB (POZ) domain containing	8.16	P	7.28	P	6.86	P	1.3	0.028	cytoplasmic	B_up
NM_029344_at	Acyp2	acylphosphatase 2, muscle type	6	P	6.72	P	4.66	A	1.3	0.029	cytoplasmic	B_up
NM_172543_at	Fam117a	family with sequence similarity 117, memberA	8.52	P	8.1	P	7.21	P	1.3	0.029	cytoplasmic	B_up
NM_007897_at	Ebf1	early B-cell factor 1	7.63	P	7.93	P	6.32	P	1.3	0.029	cytoplasmic	B_up
NM_015772_at	Sall2	sal-like 2 (Drosophila)	7.93	P	7.5	P	6.64	P	1.3	0.029	cytoplasmic	B_up
NM_001136062_at	Eno3	enolase 3, beta muscle	10.58	P	9.89	P	9.29	P	1.3	0.029	cytoplasmic	B_up
NM_199302_at	Lrsam1	leucine rich repeat and sterile alpha motif containing 1	7.86	P	7.01	P	6.56	P	1.3	0.029	cytoplasmic	B_up
NM_001081235_at	Mn1	meningioma 1	6.33	P	6.41	P	5.03	! MP	1.3	0.031	cytoplasmic	B_up
NM_009368_at	Tgfb3	transforming growth factor, beta 3	8.96	P	8.71	P	7.66	P	1.3	0.032	cytoplasmic, secreted	B_up
NM_008813_at	Enpp1	ectonucleotide pyrophosphatase/phosphodiesterase 1	8.12	P	8.1	P	6.82	P	1.3	0.032	type II	B_up
NM_027739_at	B4galnt1	beta-1,4-N-acetyl-galactosaminyl transferase 1	6.8	P	6.17	! APA	5.52	A	1.3	0.032	type II	B_up
NM_011812_at	Fbln5	fibulin 5	8.26	P	8.3	P	6.97	P	1.3	0.032	secreted	B_up
NM_026514_at	Cdc42ep3	CDC42 effector protein (Rho GTPase binding) 3	10.08	P	10.32	P	8.8	P	1.3	0.032	cytoplasmic	B_up
NM_201361_at	Fam82a1	family with sequence similarity 82, member A1	6.09	P	5.51	P	4.81	P	1.3	0.032	cytoplasmic, type II	B_up
NM_026902_at	Mcts1	malignant T cell amplified sequence 1	10.49	P	10.37	P	9.22	P	1.3	0.033	cytoplasmic	B_up
NM_010027_at	Ddt	D-dopachrome tautomerase	9.41	P	9.23	P	8.13	! PM	1.3	0.033	cytoplasmic	B_up
NM_026887_at	Ap1s2	adaptor-related protein complex 1, sigma 2 subunit	7.52	P	6.88	P	6.24	! PA	1.3	0.033	cytoplasmic	B_up
NM_023794_at	Etv5	ets variant gene 5	8.02	! PPM	8.24	! PAM	6.73	A	1.3	0.034	cytoplasmic	B_up
NM_025872_at	Golt1b	golgi transport 1 homolog B (S. cerevisiae)	8.64	P	8.39	P	7.39	P	1.3	0.035	multipass	B_up
NM_177244_at	Fastkd1	FAST kinase domains 1	7.37	P	7.15	P	6.11	P	1.3	0.034	cytoplasmic	B_up
NM_001003948_at	5033414K04Rik	RIKEN cDNA 5033414K04 gene	5.42	P	5.68	P	4.14	! PA	1.3	0.034	cytoplasmic	B_up
NM_145466_at	A2ld1	AIG2-like domain 1	8.02	P	8.08	P	6.77	P	1.3	0.035	cytoplasmic	B_up
NM_001159610_at	Lrrc57	leucine rich repeat containing 57	6.16	P	5.64	P	4.88	P	1.3	0.035	cytoplasmic	B_up
NM_011593_at	Timp1	tissue inhibitor of metalloproteinase 1	11.49	P	11.11	P	10.25	P	1.2	0.035	secreted	B_up
NM_019840_at	Pde4b	phosphodiesterase 4B, cAMP specific	5.89	P	5.26	P	4.63	P	1.3	0.035	cytoplasmic	B_up
NM_145220_at	Appl2	adaptor protein, phosphotyrosine interaction, PH domain and leucine zipper containing 2	8.26	P	7.43	P	7	P	1.3	0.035	cytoplasmic	B_up
NM_009061_at	Rgs2	regulator of G-protein signaling 2	7.8	P	8.16	P	6.55	P	1.2	0.035	cytoplasmic	B_up
NM_021272_at	Fabp7	fatty acid binding protein 7, brain	6.19	P	6	! PPA	4.91	A	1.3	0.035	cytoplasmic	B_up
NM_175194_at	Slc25a16	solute carrier family 25 (mitochondrial carrier, Graves disease autoantigen), member 16	8.35	P	8.15	P	7.08	P	1.3	0.035	cytoplasmic	B_up
NM_008287_at	Hrsp12	heat-responsive protein 12	8.62	P	7.91	P	7.36	P	1.3	0.035	cytoplasmic	B_up
NM_018763_at	Chst2	carbohydrate sulfotransferase 2	7.78	P	8.13	P	6.54	P	1.2	0.035	type II	B_up
NM_010097_at	Sparcl1	SPARC-like 1	5.98	P	6.03	! PPA	4.73	A	1.2	0.036	secreted	B_up
NM_019971_at	Pdgfc	platelet-derived growth factor, C polypeptide	9.14	P	8.28	P	7.91	P	1.2	0.037	cytoplasmic	B_up
NM_026280_at	Mxra7	matrix-remodelling associated 7	7.7	! MMM	7.46	! MMM	6.42	! MM	1.3	0.037	type II	B_up
NM_026667_at	Fam114a1	family with sequence similarity 114, member A1	8.81	P	8.35	P	7.57	P	1.2	0.037	cytoplasmic	B_up
NM_010874_at	Nat2	N-acetyltransferase 2 (arylamine N-acetyltransferase)	7.88	P	7.92	P	6.64	P	1.2	0.038	cytoplasmic	B_up
NM_026446_at	Rgs19	regulator of G-protein signaling 19	8.78	P	8.51	P	7.56	P	1.2	0.038	cytoplasmic	B_up
NM_028000_at	Ppapdc1b	phosphatidic acid phosphatase type 2 domain containing 1B	8.74	P	8.41	P	7.53	P	1.2	0.041	multipass	B_up
NM_008750_at	Nxn	nucleoredoxin	8.86	P	8.25	P	7.64	P	1.2	0.041	cytoplasmic	B_up
NM_172307_at	Mbtps2	membrane-bound transcription factor peptidase, site 2	8.38	P	8.86	P	7.16	P	1.2	0.042	cytoplasmic, multipass	B_up
NM_010217_at	Ctgf	connective tissue growth factor	13.56	P	13.47	P	12.36	P	1.2	0.042	secreted	B_up
XM_979045_at	BC030863	Derived by automated computational analysis using gene prediction method: GNOMON. Supporting evidence includes similarity to: 4 mRNAs, 143 ESTs, 1 Protein	7.47	P	6.88	P	6.27	! MA	1.2	0.043	cytoplasmic	B_up
NM_009931_at	Col4a1	collagen, type IV, alpha 1	11.25	P	11.05	P	10.05	P	1.2	0.043	secreted	B_up
NM_019521_at	Gas6	growth arrest specific 6	6.58	P	6.14	P	5.37	! PA	1.2	0.043	secreted	B_up
NM_013888_at	Dnajc12	DnaJ (Hsp40) homolog, subfamily C, member 12	6.71	P	7.18	P	5.49	! MA	1.2	0.043	cytoplasmic	B_up
NM_025931_at	Rabl4	RAB, member of RAS oncogene family-like 4	8.73	P	7.92	P	7.54	P	1.2	0.043	cytoplasmic	B_up
NM_138601_at	D10Jhu81e	DNA segment, Chr 10, Johns Hopkins University 81 expressed	9.28	P	9.04	P	8.09	P	1.2	0.044	cytoplasmic	B_up
NM_177699_at	Fhod1	formin homology 2 domain containing 1	8.53	P	8.02	! PPM	7.36	A	1.2	0.044	cytoplasmic	B_up
NM_011894_at	Sh3bp5	SH3-domain binding protein 5 (BTK-associated)	7.09	P	6.87	P	5.91	! PA	1.2	0.044	cytoplasmic, secreted	B_up
XM_001479775_at	LOC100047944	Derived by automated computational analysis using gene prediction method: GNOMON. Supporting evidence includes similarity to: 9 mRNAs, 84 ESTs, 37 Proteins	8.79	P	8.54	P	7.61	P	1.2	0.044	cytoplasmic	B_up
NM_033079_at	D6Mm5e	DNA segment, Chr 6, Miriam Meisler 5, expressed	6.34	P	5.84	! PAA	5.15	! PA	1.2	0.044	cytoplasmic	B_up
NM_009365_at	Tgfb1i1	transforming growth factor beta 1 induced transcript 1	10.08	P	9.77	P	8.9	P	1.2	0.044	cytoplasmic	B_up
NM_001081205_at	Nipal1	NIPA-like domain containing 1	7.27	P	6.6	P	6.07	P	1.2	0.045	multipass	B_up
NM_028307_at	Tdrkh	tudor and KH domain containing protein	7.68	P	8.15	P	6.51	A	1.2	0.046	type II	B_up
NM_029494_at	Rab30	RAB30, member RAS oncogene family	6.81	P	6.13	! PAP	5.64	! PA	1.2	0.046	cytoplasmic	B_up
NM_027875_at	Syde1	synapse defective 1, Rho GTPase, homolog 1 (C. elegans)	9.39	P	9.42	P	8.22	P	1.2	0.046	cytoplasmic	B_up
XM_001476728_at	LOC100046741	Derived by automated computational analysis using gene prediction method: GNOMON. Supporting evidence includes similarity to: 1 mRNA, 88 ESTs, 3 Proteins	8.85	P	8.27	P	7.68	P	1.2	0.046	cytoplasmic	B_up
NM_026740_at	Slc46a1	solute carrier family 46, member 1	6.85	P	6.6	P	5.69	P	1.2	0.046	multipass	B_up
XM_904152_at	LOC230628	Derived by automated computational analysis using gene prediction method: GNOMON. Supporting evidence includes similarity to: 16 ESTs, 1 Protein	6.44	A	7.16	! PAA	5.24	A	1.2	0.047	secreted	B_up
NM_010222_at	Fkbp7	FK506 binding protein 7	9.2	P	8.31	P	8.03	P	1.2	0.047	secreted	B_up
NM_139307_at	Vasn	vasorin	9.68	P	8.91	P	8.52	P	1.2	0.047	type I	B_up
NM_031877_at	Wasf1	WASP family 1	8.33	P	8.62	P	7.17	P	1.2	0.047	cytoplasmic	B_up
NM_011125_at	Pltp	phospholipid transfer protein	9.01	P	8.19	P	7.83	P	1.2	0.047	cytoplasmic, secreted	B_up
NM_028235_at	Ttc30b	tetratricopeptide repeat domain 30B	6.7	P	6.05	P	5.51	! PM	1.2	0.048	multipass	B_up
NM_027924_at	Pdgfd	platelet-derived growth factor, D polypeptide	7.37	P	8.04	P	6.19	P	1.2	0.05	secreted	B_up
NM_201529_at	Lmo7	LIM domain only 7	6.68	P	6.81	P	5.51	P	1.2	0.05	cytoplasmic	B_up
NM_013807_at	Plk3	polo-like kinase 3 (Drosophila)	7.05	! PMA	6.97	! PPA	5.9	A	1.2	0.05	cytoplasmic	B_up
B_down
Probeset	Symbol	Name	Asym		Sym		p53Sym		FC	pfp	Localization
NM_023056_at	Tmem176b	transmembrane protein 176B	6.51	P	6.52	P	11.38	P	-4.9	0	multipass	B_down
NM_001098271_at	Tmem176a	transmembrane protein 176A	4.93	A	4.93	A	8.69	P	-3.8	0.002	cytoplasmic, multipass	B_down
NM_053271_at	Rims2	regulating synaptic membrane exocytosis 2	4.49	! AMM	4.85	! MMA	6.93	! MM	-2.4	0	cytoplasmic	B_down
NM_008528_at	Blnk	B-cell linker	7.24	P	7.56	P	9.63	P	-2.4	0	cytoplasmic	B_down
NM_053146_at	Pcdhb21	protocadherin beta 21	4.27	! AAM	4.18	A	6.5	P	-2.2	0	type I	B_down
NM_008904_at	Ppargc1a	peroxisome proliferative activated receptor, gamma, coactivator 1 alpha	3.8	! APP	3.63	A	5.95	P	-2.2	0.002	cytoplasmic, type II	B_down
NM_001033325_at	A630095E13Rik	RIKEN cDNA A630095E13 gene	4.56	! PPA	3.71	A	6.69	P	-2.1	0.002	secreted	B_down
NM_172776_at	D630002G06Rik	RIKEN cDNA D630002G06 gene	4.62	P	3.81	A	6.72	P	-2.1	0.002	multipass	B_down
XM_989538_at	EG667281	Derived by automated computational analysis using gene prediction method: GNOMON. Supporting evidence includes similarity to: 1 EST, 2 Proteins	4.98	! PAP	4.5	! PAA	7.07	A	-2.1	0.002	multipass	B_down
NM_010743_at	Il1rl1	interleukin 1 receptor-like 1	9.4	P	10.08	P	11.34	P	-1.9	0.002	secreted, type I	B_down
NM_001025602_at	Il1rl1	interleukin 1 receptor-like 1	9.89	P	9.42	P	11.35	P	-1.5	0.015	secreted, type I	B_down
NM_007752_at	Cp	ceruloplasmin	4.9	P	4.43	! PAA	6.72	P	-1.8	0.006	secreted, type II	B_down
NM_001042611_at	Cp	ceruloplasmin	5.12	P	4.63	! PAA	7.01	P	-1.9	0.003	secreted, type II	B_down
XR_035041_at	LOC100048759	Derived by automated computational analysis using gene prediction method: GNOMON. Supporting evidence includes similarity to: 6 mRNAs, 185 ESTs, 9 Proteins	4.77	! AAP	4.2	A	6.56	P	-1.8	0.005	pseudogene	B_down
NM_009778_at	C3	complement component 3	4.82	A	4.15	A	6.6	! PM	-1.8	0.006	secreted	B_down
NM_001122596_at	A630033H20Rik	RIKEN cDNA A630033H20 gene	4.24	P	4.82	P	5.86	P	-1.6	0.009	multipass	B_down
NM_001161483_at	Nol4	nucleolar protein 4	5.25	! PPM	5.26	! MPP	6.96	P	-1.7	0.008	cytoplasmic	B_down
NM_011333_at	Ccl2	chemokine (C-C motif) ligand 2	8.16	P	8.39	P	9.75	P	-1.6	0.009	secreted	B_down
NM_053142_at	Pcdhb17	protocadherin beta 17	5.5	P	5.94	P	7.06	P	-1.6	0.012	type I	B_down
NM_027491_at	Rragd	Ras-related GTP binding D	5.78	P	5.04	! PAA	7.41	P	-1.6	0.013	cytoplasmic	B_down
NM_020012_at	Rnf14	ring finger protein 14	8.71	P	9.06	P	10.22	P	-1.5	0.013	cytoplasmic	B_down
NM_001080755_at	Zzz3	zinc finger, ZZ domain containing 3	9.18	! MMM	9.44	! MMM	10.62	! MM	-1.4	0.015	cytoplasmic	B_down
NM_022996_at	Ndfip1	Nedd4 family interacting protein 1	9.9	P	10	P	11.35	P	-1.5	0.016	multipass	B_down
XM_001001192_at	1700011I03Rik	Derived by automated computational analysis using gene prediction method: GNOMON. Supporting evidence includes similarity to: 1 mRNA, 8 ESTs	4.13	A	4.3	A	5.57	A	-1.4	0.015	cytoplasmic	B_down
NM_009701_at	Aqp5	aquaporin 5	6.31	! APA	6.65	! MMA	7.71	P	-1.4	0.016	multipass	B_down
XM_287555_at	Thsd7a	Derived by automated computational analysis using gene prediction method: GNOMON. Supporting evidence includes similarity to: 1 mRNA, 19 ESTs, 2 Proteins	6.9	P	6.81	P	8.3	P	-1.4	0.015	type II	B_down
XM_983072_at	Thsd7a	Derived by automated computational analysis using gene prediction method: GNOMON. Supporting evidence includes similarity to: 1 mRNA, 17 ESTs, 2 Proteins	6.69	P	6.57	P	8.05	P	-1.4	0.02	type II	B_down
NM_029667_at	Lce1i	late cornified envelope 1I	4.27	A	4.55	A	5.63	A	-1.4	0.02	cytoplasmic	B_down
NM_001161369_at	Ss18	synovial sarcoma translocation, Chromosome 18	9.01	P	9.68	P	10.35	P	-1.3	0.021	cytoplasmic	B_down
NM_026864_at	Rasl11a	RAS-like, family 11, member A	6.99	P	6.99	P	8.37	P	-1.4	0.019	cytoplasmic	B_down
NM_020261_at	Psg23	pregnancy-specific glycoprotein 23	6.26	! AAM	6.53	! APA	7.55	! MA	-1.3	0.022	secreted	B_down
NM_011231_at	Rabggtb	RAB geranylgeranyl transferase, b subunit	10.67	P	11.4	P	11.97	P	-1.3	0.022	cytoplasmic	B_down
NM_001013806_at	Ankrd13c	ankyrin repeat domain 13c	7.72	P	8.09	P	9.03	P	-1.3	0.021	cytoplasmic	B_down
NM_017381_at	Zranb2	zinc finger, RAN-binding domain containing 2	9.78	P	10.18	P	11.1	P	-1.3	0.022	cytoplasmic	B_down
NM_201256_at	Eif4ebp3	eukaryotic translation initiation factor 4E binding protein 3	8.27	P	8.68	P	9.55	P	-1.3	0.022	cytoplasmic	B_down
NM_010809_at	Mmp3	matrix metallopeptidase 3	5.89	! PPA	5.15	A	7.29	P	-1.4	0.025	secreted	B_down
NM_001037711_at	Cgn	cingulin	5.29	! PAP	5.63	! PPA	6.56	P	-1.3	0.024	cytoplasmic	B_down
NM_026040_at	Srfbp1	serum response factor binding protein 1	8.82	P	9.4	P	10.09	P	-1.3	0.024	cytoplasmic	B_down
NM_024194_at	Lrrc40	leucine rich repeat containing 40	8.32	P	8.88	P	9.57	P	-1.3	0.024	cytoplasmic	B_down
XM_001478852_at	1700086O06Rik	Derived by automated computational analysis using gene prediction method: GNOMON. Supporting evidence includes similarity to: 3 ESTs	5.48	P	6	P	6.8	P	-1.3	0.028	cytoplasmic	B_down
XM_001472173_at	LOC100044534	Derived by automated computational analysis using gene prediction method: GNOMON. Supporting evidence includes similarity to: 2 mRNAs, 91 ESTs, 4 Proteins	8.78	P	9.33	P	10.01	P	-1.2	0.029	cytoplasmic	B_down
NM_175375_at	Ankhd1	ankyrin repeat and KH domain containing 1	6.63	P	6.96	P	7.83	P	-1.2	0.036	cytoplasmic	B_down
NM_019809_at	Pdlim5	PDZ and LIM domain 5	7.49	P	7.18	P	8.74	P	-1.2	0.036	cytoplasmic	B_down
NM_024179_at	0610009O20Rik	RIKEN cDNA 0610009O20 gene	7.5	P	7.84	P	8.68	P	-1.2	0.037	cytoplasmic	B_down
NM_177096_at	B430203M17Rik	RIKEN cDNA B430203M17 gene	5.14	P	5.88	! PPA	6.41	P	-1.3	0.039	cytoplasmic	B_down
XR_034463_at	LOC100047967	Derived by automated computational analysis using gene prediction method: GNOMON. Supporting evidence includes similarity to: 1 mRNA, 108 ESTs, 2 Proteins	7.63	P	8.15	P	8.91	P	-1.3	0.042	pseudogene	B_down
NM_010259_at	Gbp1	guanylate binding protein 1	4.07	A	4.1	A	5.23	! PM	-1.2	0.041	multipass	B_down
NM_011100_at	Prkacb	protein kinase, cAMP dependent, catalytic, beta	7.37	P	7.76	P	8.52	P	-1.1	0.044	cytoplasmic	B_down
NM_001039088_at	Seh1l	SEH1-like (S. cerevisiae	8.81	P	9.31	P	9.96	P	-1.1	0.044	cytoplasmic	B_down
NM_028112_at	Seh1l	SEH1-like (S. cerevisiae	7.04	P	7.4	P	8.16	P	-1.1	0.05	cytoplasmic	B_down
NM_027371_at	Rpf1	ribosome production factor 1 homolog (S. cerevisiae)	8.77	P	9.39	P	9.91	P	-1.1	0.044	cytoplasmic	B_down
NM_033612_at	Cela1	chymotrypsin-like elastase family, member 1	7.6	P	7.05	P	8.77	P	-1.2	0.045	cytoplasmic, secreted	B_down
NM_008989_at	Pura	purine rich element binding protein A	7.91	P	8.42	P	9.04	P	-1.1	0.045	cytoplasmic	B_down
XM_001474780_at	LOC100040485	Derived by automated computational analysis using gene prediction method: GNOMON. Supporting evidence includes similarity to: 6 ESTs	6.64	! APP	6.65	! MAA	7.8	P	-1.2	0.045	cytoplasmic	B_down
NM_026464_at	Wdr55	WD repeat domain 55	7.8	P	8.41	P	8.92	P	-1.1	0.045	cytoplasmic	B_down
NM_001146299_at	Sh3rf2	SH3 domain containing ring finger 2	5.57	P	5.54	P	6.7	P	-1.1	0.046	cytoplasmic	B_down
A_up_B_down
Probeset	Symbol	Name	Asym		Sym		p53Sym		FC	pfp	Localization
NM_024406_at	Fabp4	fatty acid binding protein 4, adipocyte	7.87	P	5.54	P	9.25	P	2.3	0	cytoplasmic	A_up, B_down
NM_010492_at	Ica1	islet cell autoantigen 1	7.07	P	4.85	A	8.33	P	2.2	0	cytoplasmic	A_up, B_down
NM_010400_at	H60a	histocompatibility 60a	8.97	P	7.05	P	10.61	P	1.9	0.001	type I	A_up, B_down
NM_008607_at	Mmp13	matrix metallopeptidase 13	6.74	P	4.79	! PAA	9.7	P	1.9	0.001	secreted	A_up, B_down
NM_026057_at	Zfp422	zinc finger protein 422	6.32	! MMM	5.16	A	7.55	! MM	1.2	0.015	cytoplasmic	A_up, B_down
A_down_B_up
Probeset	Symbol	Name	Asym		Sym		p53Sym		FC	pfp	Localization
NM_008125_at	Gjb2	gap junction protein, beta 2	5.96	P	8.4	P	4.73	A	-2.44	0	multipass	A_down, B_up
NM_013871_at	Mapk12	mitogen-activated protein kinase 12	6.47	P	7.92	P	5.13	A	-1.46	0	cytoplasmic	A_down, B_up
NM_008973_at	Ptn	pleiotrophin	6.67	! AMM	8.34	P	4.81	A	-1.67	0	secreted	A_down, B_up
NM_145158_at	Emilin2	elastin microfibril interfacer 2	8.14	P	9.12	P	6.97	P	-0.97	0.011	cytoplasmic, secreted	A_down, B_up
NM_027052_at	Slc38a4	solute carrier family 38, member 4	8.44	P	9.21	P	4.63	! PA	-0.77	0.04	multipass	A_down, B_up
1. Sprenger J, Lynn Fink J, Karunaratne S, Hanson K, Hamilton NA, et al. (2008) LOCATE: a mammalian protein subcellular localization database. Nucleic Acids Res 36 (Database issue): D230-D233.
